# Supplementary material for: Canonical Wnt signaling and the regulation of divergent mesenchymal Fgf8 expression in axolotl limb development and regeneration
Source: eLife journal article supplement (doi:10.7554/elife.79762), 2022-05-19
Supplement: supp [file elife-79762-supp-v1.zip]

Archive with 11 entries (11 files):
- elife_poa_e79762_Figure_5_source_data_1.xlsx
- elife_poa_e79762_Transparent_Reporting_File.pdf
- elife_poa_e79762_Figure_1_figure_supplement_1.png
- elife_poa_e79762_Figure_1_figure_supplement_2.png
- elife_poa_e79762_Figure_2_figure_supplement_1.png
- elife_poa_e79762_Figure_4_figure_supplement_1.png
- elife_poa_e79762_Figure_4_figure_supplement_2.png
- elife_poa_e79762_Figure_5_figure_supplement_1.png
- elife_poa_e79762_Figure_5_figure_supplement_2.png
- elife_poa_e79762_Figure_5_figure_supplement_3.png
- elife_poa_e79762_Supplementary_file_1.xlsx
