# Supplementary material for: Canonical Wnt signaling and the regulation of divergent mesenchymal Fgf8 expression in axolotl limb development and regeneration
Source: eLife journal article supplement (doi:10.7554/elife.79762), 2022-05-19
Supplement: supp [file elife-79762-supp-v1.zip › elife_poa_e79762_Figure_5_source_data_1.xlsx]

## Sheet: CHIR Experiment
Normalized Signal Intensity	Condition (Each row represents one sample)		Combining R1 and R2 imaging sessions: Wilcoxon rank sum Fgf8 R1 vs R2			Normalized Signal Intensity	Condition (Combined R1 and R2)		Condition	Number of Samples	Mean	Standard Deviation		Group 1	Group 2	p	p adjusted	p formatted	significance	Method
1.03416	R2 Fgf8 6h DMSO		Condition	p-value		0.94803	Fgf8 6h DMSO		Axin2 12h CHIR	4	3.2375	1.1768		Axin2 3h CHIR	Axin2 3h DMSO	0.0001554	0.0023	0.00016	***	Wilcoxon
1.04253	R2 Fgf8 6h DMSO		3h DMSO	1		1.13455	Fgf8 6h DMSO		Axin2 12h DMSO	4	1	0.0412422		Axin2 6h CHIR	Axin2 6h DMSO	0.0001554	0.0023	0.00016	***	Wilcoxon
0.937262	R2 Fgf8 6h DMSO		3h CHIR	0.4857		0.986288	Fgf8 6h DMSO		Axin2 3h CHIR	8	2.21845	0.59758		Axin2 12h CHIR	Axin2 12h DMSO	0.0285714	0.2	0.02857	*	Wilcoxon
0.986043	R2 Fgf8 6h DMSO		6h DMSO	0.8857		0.931128	Fgf8 6h DMSO		Axin2 3h DMSO	8	1	0.175269
1.22977	R2 Fgf8 6h CHIR		6h CHIR	0.3429		1.03416	Fgf8 6h DMSO		Axin2 6h CHIR	8	3.09524	0.751362		Fgf8 3h CHIR	Fgf8 3h DMSO	0.0001554	0.0023	0.00016	***	Wilcoxon
1.25825	R2 Fgf8 6h CHIR					1.04253	Fgf8 6h DMSO		Axin2 6h DMSO	8	1	0.19469		Fgf8 6h CHIR	Fgf8 6h DMSO	0.194872	1	0.19487	ns	Wilcoxon
1.24771	R2 Fgf8 6h CHIR					0.937262	Fgf8 6h DMSO		Fgf8 12h CHIR	8	0.734348	0.166484		Fgf8 12h CHIR	Fgf8 12h DMSO	0.0010878	0.011	0.00109	**	Wilcoxon
1.28619	R2 Fgf8 6h CHIR					0.986043	Fgf8 6h DMSO		Fgf8 12h DMSO	8	1	0.0640364
1.08659	R2 Fgf8 3h DMSO					0.518399	Fgf8 6h CHIR		Fgf8 3h CHIR	8	1.46435	0.0931828
1.10906	R2 Fgf8 3h DMSO					0.990953	Fgf8 6h CHIR		Fgf8 3h DMSO	8	1	0.0804764
0.869577	R2 Fgf8 3h DMSO					0.691937	Fgf8 6h CHIR		Fgf8 6h CHIR	8	1.06766	0.305712
0.934778	R2 Fgf8 3h DMSO					1.31806	Fgf8 6h CHIR		Fgf8 6h DMSO	8	1	0.0684979
1.43104	R2 Fgf8 3h CHIR					1.22977	Fgf8 6h CHIR
1.33565	R2 Fgf8 3h CHIR					1.25825	Fgf8 6h CHIR
1.50595	R2 Fgf8 3h CHIR					1.24771	Fgf8 6h CHIR
1.48334	R2 Fgf8 3h CHIR					1.28619	Fgf8 6h CHIR
0.904803	R2 Axin2 6h DMSO					0.944259	Fgf8 3h DMSO
1.13141	R2 Axin2 6h DMSO					1.00048	Fgf8 3h DMSO
0.795987	R2 Axin2 6h DMSO					1.03241	Fgf8 3h DMSO
1.1678	R2 Axin2 6h DMSO					1.02285	Fgf8 3h DMSO
2.72283	R2 Axin2 6h CHIR					1.08659	Fgf8 3h DMSO
3.76271	R2 Axin2 6h CHIR					1.10906	Fgf8 3h DMSO
3.14231	R2 Axin2 6h CHIR					0.869577	Fgf8 3h DMSO
4.06932	R2 Axin2 6h CHIR					0.934778	Fgf8 3h DMSO
0.96638	R2 Axin2 3h DMSO					1.46063	Fgf8 3h CHIR
1.05544	R2 Axin2 3h DMSO					1.59415	Fgf8 3h CHIR
1.14384	R2 Axin2 3h DMSO					1.34282	Fgf8 3h CHIR
0.834346	R2 Axin2 3h DMSO					1.56123	Fgf8 3h CHIR
2.96363	R2 Axin2 3h CHIR					1.43104	Fgf8 3h CHIR
2.92834	R2 Axin2 3h CHIR					1.33565	Fgf8 3h CHIR
2.76133	R2 Axin2 3h CHIR					1.50595	Fgf8 3h CHIR
2.27289	R2 Axin2 3h CHIR					1.48334	Fgf8 3h CHIR
0.94803	R1 Fgf8 6h DMSO					1.00928	Fgf8 12h DMSO
1.13455	R1 Fgf8 6h DMSO					1.05208	Fgf8 12h DMSO
0.986288	R1 Fgf8 6h DMSO					0.952672	Fgf8 12h DMSO
0.931128	R1 Fgf8 6h DMSO					0.985967	Fgf8 12h DMSO
0.518399	R1 Fgf8 6h CHIR					1.02313	Fgf8 12h DMSO
0.990953	R1 Fgf8 6h CHIR					0.994948	Fgf8 12h DMSO
0.691937	R1 Fgf8 6h CHIR					0.884318	Fgf8 12h DMSO
1.31806	R1 Fgf8 6h CHIR					1.0976	Fgf8 12h DMSO
0.944259	R1 Fgf8 3h DMSO					0.852983	Fgf8 12h CHIR
1.00048	R1 Fgf8 3h DMSO					0.797546	Fgf8 12h CHIR
1.03241	R1 Fgf8 3h DMSO					0.960122	Fgf8 12h CHIR
1.02285	R1 Fgf8 3h DMSO					0.91357	Fgf8 12h CHIR
1.46063	R1 Fgf8 3h CHIR					0.584679	Fgf8 12h CHIR
1.59415	R1 Fgf8 3h CHIR					0.543625	Fgf8 12h CHIR
1.34282	R1 Fgf8 3h CHIR					0.568036	Fgf8 12h CHIR
1.56123	R1 Fgf8 3h CHIR					0.654219	Fgf8 12h CHIR
0.871934	R1 Axin2 6h DMSO					0.871934	Axin2 6h DMSO
1.32132	R1 Axin2 6h DMSO					1.32132	Axin2 6h DMSO
1.02768	R1 Axin2 6h DMSO					1.02768	Axin2 6h DMSO
0.779073	R1 Axin2 6h DMSO					0.779073	Axin2 6h DMSO
1.80322	R1 Axin2 6h CHIR					0.904803	Axin2 6h DMSO
3.3186	R1 Axin2 6h CHIR					1.1314	Axin2 6h DMSO
2.39409	R1 Axin2 6h CHIR					0.795987	Axin2 6h DMSO
3.54881	R1 Axin2 6h CHIR					1.1678	Axin2 6h DMSO
0.781974	R1 Axin2 3h DMSO					1.80322	Axin2 6h CHIR
1.03377	R1 Axin2 3h DMSO					3.3186	Axin2 6h CHIR
1.31241	R1 Axin2 3h DMSO					2.39409	Axin2 6h CHIR
0.871847	R1 Axin2 3h DMSO					3.54881	Axin2 6h CHIR
1.85917	R1 Axin2 3h CHIR					2.72283	Axin2 6h CHIR
1.50153	R1 Axin2 3h CHIR					3.76271	Axin2 6h CHIR
1.62254	R1 Axin2 3h CHIR					3.14231	Axin2 6h CHIR
1.83814	R1 Axin2 3h CHIR					4.06933	Axin2 6h CHIR
1.00928	Fgf8 12h DMSO					0.781974	Axin2 3h DMSO
1.05208	Fgf8 12h DMSO					1.03377	Axin2 3h DMSO
0.952672	Fgf8 12h DMSO					1.31241	Axin2 3h DMSO
0.985967	Fgf8 12h DMSO					0.871847	Axin2 3h DMSO
1.02313	Fgf8 12h DMSO					0.966381	Axin2 3h DMSO
0.994948	Fgf8 12h DMSO					1.05544	Axin2 3h DMSO
0.884318	Fgf8 12h DMSO					1.14383	Axin2 3h DMSO
1.0976	Fgf8 12h DMSO					0.834346	Axin2 3h DMSO
0.852983	Fgf8 12h CHIR					1.85917	Axin2 3h CHIR
0.797546	Fgf8 12h CHIR					1.50154	Axin2 3h CHIR
0.960122	Fgf8 12h CHIR					1.62254	Axin2 3h CHIR
0.91357	Fgf8 12h CHIR					1.83814	Axin2 3h CHIR
0.584679	Fgf8 12h CHIR					2.96363	Axin2 3h CHIR
0.543625	Fgf8 12h CHIR					2.92834	Axin2 3h CHIR
0.568036	Fgf8 12h CHIR					2.76133	Axin2 3h CHIR
0.654219	Fgf8 12h CHIR					2.27289	Axin2 3h CHIR
1.05842	Axin2 12h DMSO					1.05842	Axin2 12h DMSO
0.999706	Axin2 12h DMSO					0.999706	Axin2 12h DMSO
0.970798	Axin2 12h DMSO					0.970798	Axin2 12h DMSO
0.971074	Axin2 12h DMSO					0.971074	Axin2 12h DMSO
4.56544	Axin2 12h CHIR					4.56544	Axin2 12h CHIR
1.71502	Axin2 12h CHIR					1.71502	Axin2 12h CHIR
3.49954	Axin2 12h CHIR					3.49954	Axin2 12h CHIR
3.17	Axin2 12h CHIR					3.17	Axin2 12h CHIR

## Sheet: IWR Experiment
Normalized Signal Intensity	Condition (Each row represents one sample)		Condition	Number of Samples	Mean	Standard Deviation		Group 1	Group 2	p	p adjusted	p formatted	significance	Method
1.1132	Axin2 DMSO		Axin2 DMSO	6	1	0.0859424		Axin2 DMSO	Axin2 IWR	0.002331	0.014	0.0023	**	Wilcoxon
1.0562	Axin2 DMSO		Axin2 IWR	7	0.741182	0.0680334		Fgf8 DMSO	Fgf8 IWR	0.00815851	0.033	0.0082	**	Wilcoxon
0.732084	Axin2 IWR		Fgf8 DMSO	6	1	0.139828
0.698357	Axin2 IWR		Fgf8 IWR	7	0.679623	0.146958
0.856002	Axin2 DMSO
0.74183	Axin2 IWR
0.992225	Axin2 DMSO
0.733016	Axin2 IWR
0.989408	Axin2 DMSO
0.752922	Axin2 IWR
0.992961	Axin2 DMSO
0.654325	Axin2 IWR
0.875738	Axin2 IWR
0.892077	Fgf8 DMSO
1.04768	Fgf8 DMSO
0.59755	Fgf8 IWR
0.608944	Fgf8 IWR
0.976471	Fgf8 DMSO
0.716147	Fgf8 IWR
1.00857	Fgf8 DMSO
0.658107	Fgf8 IWR
1.23808	Fgf8 DMSO
0.604105	Fgf8 IWR
0.83712	Fgf8 DMSO
0.576959	Fgf8 IWR
0.995548	Fgf8 IWR

## Sheet: CHIR Epidermis vs Mesenchyme
Normalized Signal Intensity	Condition (Each row represents one sample)		Condition	Number of Samples	Mean	Standard Deviation		Group 1	Group 2	p	p adjusted	p formatted	significance	Method
0.762926	Epidermis 3h CHIR		Epidermis 3h CHIR	8	1.79038	0.795662		Epidermis 3h CHIR	Epidermis 3h DMSO	0.014763	0.18	0.01476	*	Wilcoxon
1.12528	Epidermis 3h CHIR		Epidermis 3h DMSO	8	1	0.259508		Mesenchyme 3h CHIR	Mesenchyme 3h DMSO	0.000621601	0.011	0.00062	***	Wilcoxon
1.16365	Epidermis 3h CHIR		Epidermis 6h CHIR	8	1.73093	0.672088		Epidermis 6h CHIR	Epidermis 6h DMSO	0.0206682	0.19	0.02067	*	Wilcoxon
1.60745	Epidermis 3h CHIR		Epidermis 6h DMSO	8	1	0.308203		Mesenchyme 6h CHIR	Mesenchyme 6h DMSO	0.0001554	0.0044	0.00016	***	Wilcoxon
2.36658	Epidermis 3h CHIR		Mesenchyme 3h CHIR	8	6.29589	1.86463
3.21854	Epidermis 3h CHIR		Mesenchyme 3h DMSO	8	2.35535	1.16084
1.96282	Epidermis 3h CHIR		Mesenchyme 6h CHIR	8	10.8226	3.05219
2.11578	Epidermis 3h CHIR		Mesenchyme 6h DMSO	8	2.48102	1.3289
0.658817	Epidermis 3h DMSO
0.783261	Epidermis 3h DMSO
1.54844	Epidermis 3h DMSO
1.00949	Epidermis 3h DMSO
0.950033	Epidermis 3h DMSO
1.06685	Epidermis 3h DMSO
0.986678	Epidermis 3h DMSO
0.996443	Epidermis 3h DMSO
0.55836	Epidermis 6h CHIR
1.81821	Epidermis 6h CHIR
1.19123	Epidermis 6h CHIR
1.42421	Epidermis 6h CHIR
1.87833	Epidermis 6h CHIR
1.97246	Epidermis 6h CHIR
2.25338	Epidermis 6h CHIR
2.75123	Epidermis 6h CHIR
0.915304	Epidermis 6h DMSO
1.65449	Epidermis 6h DMSO
0.753398	Epidermis 6h DMSO
0.676805	Epidermis 6h DMSO
1.01487	Epidermis 6h DMSO
1.10198	Epidermis 6h DMSO
0.788812	Epidermis 6h DMSO
1.09434	Epidermis 6h DMSO
5.55355	Mesenchyme 3h CHIR
4.29299	Mesenchyme 3h CHIR
5.41175	Mesenchyme 3h CHIR
6.03673	Mesenchyme 3h CHIR
9.77487	Mesenchyme 3h CHIR
6.10425	Mesenchyme 3h CHIR
8.41385	Mesenchyme 3h CHIR
4.77914	Mesenchyme 3h CHIR
1.59181	Mesenchyme 3h DMSO
2.53919	Mesenchyme 3h DMSO
4.99305	Mesenchyme 3h DMSO
2.12347	Mesenchyme 3h DMSO
1.93367	Mesenchyme 3h DMSO
2.50225	Mesenchyme 3h DMSO
2.028	Mesenchyme 3h DMSO
1.13133	Mesenchyme 3h DMSO
6.90799	Mesenchyme 6h CHIR
13.6861	Mesenchyme 6h CHIR
8.87087	Mesenchyme 6h CHIR
13.2288	Mesenchyme 6h CHIR
10.3473	Mesenchyme 6h CHIR
9.4105	Mesenchyme 6h CHIR
8.40539	Mesenchyme 6h CHIR
15.7241	Mesenchyme 6h CHIR
2.05261	Mesenchyme 6h DMSO
5.20034	Mesenchyme 6h DMSO
2.87614	Mesenchyme 6h DMSO
2.05025	Mesenchyme 6h DMSO
1.57273	Mesenchyme 6h DMSO
2.93238	Mesenchyme 6h DMSO
0.634164	Mesenchyme 6h DMSO
2.52952	Mesenchyme 6h DMSO
