# Supplementary material for: Canonical Wnt signaling and the regulation of divergent mesenchymal Fgf8 expression in axolotl limb development and regeneration
Source: eLife journal article supplement (doi:10.7554/elife.79762), 2022-05-19
Supplement: supp [file elife-79762-supp-v1.zip › elife_poa_e79762_Supplementary_file_1.xlsx]

## Sheet: Sheet1
Pool name (Gene-Initiator)	Sequence	Molecular instruments Identifier
Fgf8-B1		PRB272
Fgf10-B2		PRD820
Fgfr2b-B5		PRD827
Prrx1-B1		PRD822
Lef1-B2	CCTCGTAAATCCTCATCAaaGAGTGGAACTCCAGCCCAGGCGCCC
Lef1-B2	TGCGGCTGCTGCACAGCCTGTCTCTaaATCATCCAGTAAACCGCC
Lef1-B2	CCTCGTAAATCCTCATCAaaGTCCTGTGCTGGGACTTTCTGGGCC
Lef1-B2	TTGTGATTCCTTGAGAGTTTTGTGCaaATCATCCAGTAAACCGCC
Lef1-B2	CCTCGTAAATCCTCATCAaaGTCGTCAGACTCGAAAAGTCTTTAA
Lef1-B2	AGGGTCGCCTCTGCTCCCGAGGTTCaaATCATCCAGTAAACCGCC
Lef1-B2	CCTCGTAAATCCTCATCAaaCCGCCCCTCTCAGCCTCTGTTCCAG
Lef1-B2	CTTCCAATGCCAGATCTGTCAGTCAaaATCATCCAGTAAACCGCC
Lef1-B2	CCTCGTAAATCCTCATCAaaTGCTACCCACCTCGGGCCACGGCCT
Lef1-B2	ACCCAGGCTCAGCCTCTGCGTTCCTaaATCATCCAGTAAACCGCC
Lef1-B2	CCTCGTAAATCCTCATCAaaCACGCACAGTCAGAAAGAATGCAGC
Lef1-B2	AGAAGTTGCAGTAGCTGCGGTGAGAaaATCATCCAGTAAACCGCC
Lef1-B2	CCTCGTAAATCCTCATCAaaCTTGTCCTTTGTCCAGGAACTAAAA
Lef1-B2	CCTTGGAGAGCTCTCGTATTCTGCAaaATCATCCAGTAAACCGCC
Lef1-B2	CCTCGTAAATCCTCATCAaaGCTGGGCAATCCCTCCCCTGCTGTT
Lef1-B2	AATCACGTCCTCTGTTACGGGAACCaaATCATCCAGTAAACCGCC
Lef1-B2	CCTCGTAAATCCTCATCAaaGTGAACCCAGAGGGAGAGCGAGCGC
Lef1-B2	GGGGTGAGTAAAGCGCCGGGGCTGCaaATCATCCAGTAAACCGCC
Lef1-B2	CCTCGTAAATCCTCATCAaaAAACGTGTGGCGGGTCTCTGTGACT
Lef1-B2	CCTGGGGCTCGTGTCTGGACTGTGAaaATCATCCAGTAAACCGCC
Lef1-B2	CCTCGTAAATCCTCATCAaaCACTCTGCCGGCGTGTGCCTCGTGG
Lef1-B2	AGCGCCCAGGCGAACTTCCCTGGCCaaATCATCCAGTAAACCGCC
Lef1-B2	CCTCGTAAATCCTCATCAaaTATGCCCAGGAGCTGTGCCACACGA
Lef1-B2	TGCTCTCGATGTGACGGGTAACCCCaaATCATCCAGTAAACCGCC
Lef1-B2	CCTCGTAAATCCTCATCAaaTGGGGATGTCCCTGTGTCCTGGGGC
Lef1-B2	GTCGATGTGCTCTCCAGTGGACGGGaaATCATCCAGTAAACCGCC
Lef1-B2	CCTCGTAAATCCTCATCAaaTTCGTTCTCAGTGGAGGGGCGTGAG
Lef1-B2	CTGTGCTGGGCGAAGCATCACCGAGaaATCATCCAGTAAACCGCC
Lef1-B2	CCTCGTAAATCCTCATCAaaCGCCGAGAAGAGACTGGATTCTCAG
Lef1-B2	GTATACTGCTCTTCGAAGTTGTTCAaaATCATCCAGTAAACCGCC
Lef1-B2	CCTCGTAAATCCTCATCAaaATCCACAGCTGCACGGGTGGCTCAG
Lef1-B2	CTTAAACCACGCATATATGCATTTAaaATCATCCAGTAAACCGCC
Lef1-B2	CCTCGTAAATCCTCATCAaaCCTCAGAAGGCGATGCTCCAGCAGC
Lef1-B2	GGAGGAAGGCCCACGTCACGTTCTGaaATCATCCAGTAAACCGCC
Lef1-B2	CCTCGTAAATCCTCATCAaaGCAGATCCGAAGCGGGTGGGCACCT
Lef1-B2	GCAATCCCGCCGATGCGTAGACCGCaaATCATCCAGTAAACCGCC
Lef1-B2	CCTCGTAAATCCTCATCAaaTGAATGCCCCTGTAAGCAGCCGTCT
Lef1-B2	GACGGGCAGAAAACTCGCCGCAGCCaaATCATCCAGTAAACCGCC
Lef1-B2	CCTCGTAAATCCTCATCAaaGGCAAGTGCTTGGGTAGCGCTTCGC
Lef1-B2	AGCTGGGGCATGCTACCCCACTAAGaaATCATCCAGTAAACCGCC
Lef1-B2	CCTCGTAAATCCTCATCAaaCGTCGGTGGCGCAAAGCTCGGGGTC
Lef1-B2	CCCCTTCATCCTTAAAGGGGATCATaaATCATCCAGTAAACCGCC
Lef1-B2	CCTCGTAAATCCTCATCAaaCGGTGTAGCTGGGTTCCTCCTGCGG
Lef1-B2	CCTCCTCCTCGCCGGGGTGGCTGATaaATCATCCAGTAAACCGCC
Lef1-B2	CCTCGTAAATCCTCATCAaaACTTGATGTCGGCCAGGTCCCCGTC
Lef1-B2	TGATCTCCGACTCATTGACCAGCGAaaATCATCCAGTAAACCGCC
Lef1-B2	CCTCGTAAATCCTCATCAaaTATAAGCCATCTGGATGTTTACCAC
Lef1-B2	TAGCCATGGTAAGACGGGCCTTTGCaaATCATCCAGTAAACCGCC
Lef1-B2	CCTCGTAAATCCTCATCAaaGCTGCACCACGGGCACTTTGTTGGA
Lef1-B2	GTGTGAGAGGGTGGACTGCGTGCGAaaATCATCCAGTAAACCGCC
Lef1-B2	CCTCGTAAATCCTCATCAaaGCCGAGAAAGCATTTCTCTTTCCTC
Lef1-B2	CCTGATGCTGCCGCTTTCGCATTGCaaATCATCCAGTAAACCGCC
Lef1-B2	CCTCGTAAATCCTCATCAaaTAGCAGGCTTCCATCTCCAGAAGGG
Lef1-B2	CGGGCACATGGGAGAGGCCCATGGTaaATCATCCAGTAAACCGCC
Lef1-B2	CCTCGTAAATCCTCATCAaaGAGTAGGCTCCACGATGGGTGACTC
Lef1-B2	CAAGGAAGTCACAGAAGACTCCTGTaaATCATCCAGTAAACCGCC
Lef1-B2	CCTCGTAAATCCTCATCAaaTCTCTGGCAGTGACATCAGTGGGGC
Lef1-B2	GGCAGTGATTGTCTTTAAGTTTCAGaaATCATCCAGTAAACCGCC
Lef1-B2	CCTCGTAAATCCTCATCAaaCATTTGTTGGCAATGAATGGGGATG
Lef1-B2	GTCACGTGCTCTGGCATCCAACATCaaATCATCCAGTAAACCGCC
Dlx6-B2	CCTCGTAAATCCTCATCAaaATCGCCCGCTTTCATAAACACGCCC
Dlx6-B2	AGATGCACGGACCAGGCTCCTGCGCaaATCATCCAGTAAACCGCC
Dlx6-B2	CCTCGTAAATCCTCATCAaaAGATCTGCCCATCGCTCTGCTTAAG
Dlx6-B2	CCTTAACTGGGTAGAAAGCACCTCCaaATCATCCAGTAAACCGCC
Dlx6-B2	CCTCGTAAATCCTCATCAaaAGCGATCGCTCCTCGGTGCTGTGTC
Dlx6-B2	CCATTCATGCGCGCTGCCACGCCACaaATCATCCAGTAAACCGCC
Dlx6-B2	CCTCGTAAATCCTCATCAaaTGACGGGCCTGCGTGTTGCAATGTG
Dlx6-B2	CAATAGCCACACTACTGCCTCCTTGaaATCATCCAGTAAACCGCC
Dlx6-B2	CCTCGTAAATCCTCATCAaaAGCACGGCTTCCAGGTGTGCTCACA
Dlx6-B2	AGGCGTGCGTAGCACACACGCCGCCaaATCATCCAGTAAACCGCC
Dlx6-B2	CCTCGTAAATCCTCATCAaaACTTCACCATACAGCCTCACCCAAA
Dlx6-B2	AACCTCCTTATGTGCGCGCACGAAAaaATCATCCAGTAAACCGCC
Dlx6-B2	CCTCGTAAATCCTCATCAaaTGTGTGCGCACTCTACGTCCACAGA
Dlx6-B2	CACCAAGCATCCTCACAGCAGATCCaaATCATCCAGTAAACCGCC
Dlx6-B2	CCTCGTAAATCCTCATCAaaCCACGTGTGCACACTCCACCTCCCA
Dlx6-B2	TGCACAATCCACCTTACGGGACATCaaATCATCCAGTAAACCGCC
Dlx6-B2	CCTCGTAAATCCTCATCAaaCCACCTCCACTGAGCGGATTCCTTG
Dlx6-B2	CCAGAGCTGCTTCCTTGTGTGCTATaaATCATCCAGTAAACCGCC
Dlx6-B2	CCTCGTAAATCCTCATCAaaCTAGTGCTCGGTGCTGCTGGTGCCT
Dlx6-B2	GACGTCACAAACCTTGGGGCTGCTGaaATCATCCAGTAAACCGCC
Dlx6-B2	CCTCGTAAATCCTCATCAaaCGCTTCCCGATTGGTCACTCACCCC
Dlx6-B2	TCGGAATGGTTTGTCTCCAAAGGGCaaATCATCCAGTAAACCGCC
Dlx6-B2	CCTCGTAAATCCTCATCAaaTTTTAGACTTCGCTTAGACGCCACA
Dlx6-B2	CCGCCGCCGCTAAAGTTGCGCTCCTaaATCATCCAGTAAACCGCC
Dlx6-B2	CCTCGTAAATCCTCATCAaaGTTTAAGGCGGATGTCTTAAGGTGG
Dlx6-B2	GCCCTTTGTTTCCTTTGTGGCCCGTaaATCATCCAGTAAACCGCC
Dlx6-B2	CCTCGTAAATCCTCATCAaaAAAGTTTGTGAGCGAGCGCCCGCCA
Dlx6-B2	TCAGCCATGGCCGTCATGGTCATCAaaATCATCCAGTAAACCGCC
Dlx6-B2	CCTCGTAAATCCTCATCAaaTTGGACGAGTCGGCGGCTTCCAAGC
Dlx6-B2	GACTGACCGAACTCCATGAAGGCGGaaATCATCCAGTAAACCGCC
Dlx6-B2	CCTCGTAAATCCTCATCAaaTGCTGCTGCTGCTGCTGCTGGGAGG
Dlx6-B2	GCCATGGCCGGGGAGCTCTGCTGCTaaATCATCCAGTAAACCGCC
Dlx6-B2	CCTCGTAAATCCTCATCAaaTGTGGGTGGTGCTGGTGGCCCAGCG
Dlx6-B2	GCGTCGTGCTGGTGCTGCGGGTGGTaaATCATCCAGTAAACCGCC
Dlx6-B2	CCTCGTAAATCCTCATCAaaCCCATGTAGGGGTAGACGGAGGCGG
Dlx6-B2	TGCAGGTAGGGGCTGTGCTGCGAGTaaATCATCCAGTAAACCGCC
Dlx6-B2	CCTCGTAAATCCTCATCAaaGCTTGTTCTGAAACCAGATCTTCAC
Dlx6-B2	GCTTCAATAGCTTCTTAAACTTGGAaaATCATCCAGTAAACCGCC
Dlx6-B2	CCTCGTAAATCCTCATCAaaGGTCGCTTTCGTGCGGATTGCCGCC
Dlx6-B2	GAGACAGGGCAGCTGTGCCCGGCAGaaATCATCCAGTAAACCGCC
Dlx6-B2	CCTCGTAAATCCTCATCAaaCCCTTGGCAGAGGCGGAAACGTCCC
Dlx6-B2	ATGTAGCTGTTGGCCGCCATGTTCAaaATCATCCAGTAAACCGCC
Dlx6-B2	CCTCGTAAATCCTCATCAaaGACGAGTACCAGTGAGAGTAGCCGG
Dlx6-B2	GCTCTCTGCATGGTGTCCTGGTGTGaaATCATCCAGTAAACCGCC
Dlx6-B2	CCTCGTAAATCCTCATCAaaCATGTGAAGTGATGCAAGCGTACCC
Dlx6-B2	TCCTCCCCAGGCGGCCTTTGCAGAAaaATCATCCAGTAAACCGCC
Dlx6-B2	CCTCGTAAATCCTCATCAaaTCATTCCACAGTTAAGCAGGCCGGG
Dlx6-B2	GTGTGAACGCTGCGAGCCACATAGGaaATCATCCAGTAAACCGCC
Dlx6-B2	CCTCGTAAATCCTCATCAaaTCTCATACAGAAGGCCTCAATTAGT
Dlx6-B2	TGTGTGCACGGTGACCCTGCGAGACaaATCATCCAGTAAACCGCC
Dlx6-B2	CCTCGTAAATCCTCATCAaaTTAGTGCTGTGTCCATGCGTGTGTG
Dlx6-B2	TCTTTTGCAAAGTTTAGACTAGTCGaaATCATCCAGTAAACCGCC
Dlx6-B2	CCTCGTAAATCCTCATCAaaTAACAGTGGTTCATGTGTTGCTTCC
Dlx6-B2	GGTGTGTTGCTGGTTTGTGGAGCTTaaATCATCCAGTAAACCGCC
Dlx6-B2	CCTCGTAAATCCTCATCAaaCCCCTGTAGGTCCTCCTTGTGTTTC
Dlx6-B2	AAGGGATGCCATCGGGAAGGCCCGAaaATCATCCAGTAAACCGCC
Dlx6-B2	CCTCGTAAATCCTCATCAaaTCATATAAATGTCCCTTCCTTTTGC
Dlx6-B2	ATTCAACCATATATACATACATGTTaaATCATCCAGTAAACCGCC
Dlx6-B2	CCTCGTAAATCCTCATCAaaTTACCATACAAAGTATTTACAACCG
Dlx6-B2	GCTTCACGCGAAATATGAAAGGTGAaaATCATCCAGTAAACCGCC
Rspo2-B1	GAGGAGGGCAGCAAACGGaaGAAAGGCGATGCTCGGAGCCAGCAG
Rspo2-B1	CTGCCGACAGGGGCCCGGCAAGTGAtaGAAGAGTCTTCCTTTACG
Rspo2-B1	GAGGAGGGCAGCAAACGGaaTCACAGAGGGCTGCCCAACCAGCGC
Rspo2-B1	CTAAGTTGGAGCTGCAGAGACAGTAtaGAAGAGTCTTCCTTTACG
Rspo2-B1	GAGGAGGGCAGCAAACGGaaGGTACCACGGAAGTAGGCTTGCCCC
Rspo2-B1	CGGAGCGGCGTGTGGGATTCTGCACtaGAAGAGTCTTCCTTTACG
Rspo2-B1	GAGGAGGGCAGCAAACGGaaCCACAGTCACCGCTTCTCGCTTCAC
Rspo2-B1	GCACAGGGCACACGCAGGGGATTTCtaGAAGAGTCTTCCTTTACG
Rspo2-B1	GAGGAGGGCAGCAAACGGaaTGCAGGCTCCGCTGTCCAGGGTCCC
Rspo2-B1	CCGAGGTCGGGTCGGGAGCTTAGCAtaGAAGAGTCTTCCTTTACG
Rspo2-B1	GAGGAGGGCAGCAAACGGaaCAGCCTGCCGAGGAAAAGCGGCTCT
Rspo2-B1	GAGCTGCATCTAGGCAGAGGGTGAGtaGAAGAGTCTTCCTTTACG
Rspo2-B1	GAGGAGGGCAGCAAACGGaaGTTTGGGCTGACATCGCATGCACCC
Rspo2-B1	TGCCTTCCCTCCGGAGGAAGAAGAAtaGAAGAGTCTTCCTTTACG
Rspo2-B1	GAGGAGGGCAGCAAACGGaaCTCCAAGGGCCAACTTCACACCCTT
Rspo2-B1	TTGTTTCTGCTGCATGTTCCCCACTtaGAAGAGTCTTCCTTTACG
Rspo2-B1	GAGGAGGGCAGCAAACGGaaTCCTTCATTTTGGGTGTCCTCTTTC
Rspo2-B1	TTTCGCTTCTTCTTCTTATTTCTCTtaGAAGAGTCTTCCTTTACG
Rspo2-B1	GAGGAGGGCAGCAAACGGaaAAAAGGAATCAGATTGTCTGTGCTG
Rspo2-B1	ATAGAGCAACGTTTGTGCACTTTGCtaGAAGAGTCTTCCTTTACG
Rspo2-B1	GAGGAGGGCAGCAAACGGaaGGCTTGTCACCATTTCTCACAAGGT
Rspo2-B1	AAATGTAATGTATAAATAACACAAAtaGAAGAGTCTTCCTTTACG
Rspo2-B1	GAGGAGGGCAGCAAACGGaaCATAGGTTTTAGACGCATGTCCACA
Rspo2-B1	ATGGGTCGCTCTGTCGCCAGCACGGtaGAAGAGTCTTCCTTTACG
Rspo2-B1	GAGGAGGGCAGCAAACGGaaTTACATAAATATGCACACCAAGTCC
Rspo2-B1	ACTGCTTCCACCTCCATGTTTCTTCtaGAAGAGTCTTCCTTTACG
Rspo2-B1	GAGGAGGGCAGCAAACGGaaTTAACACTGAGCATACAGTCCATGT
Rspo2-B1	TCCAGAAATGGGCGCAGAGGACGTAtaGAAGAGTCTTCCTTTACG
Rspo2-B1	GAGGAGGGCAGCAAACGGaaTGTAACTGCTATGCTACCCGTAACA
Rspo2-B1	GTTGACTTCCATCTCTATGTACATGtaGAAGAGTCTTCCTTTACG
Rspo2-B1	GAGGAGGGCAGCAAACGGaaCTGGAAACGCACTCATCACGCGTAT
Rspo2-B1	TTTCTCCGAACAATTCGACATATGTtaGAAGAGTCTTCCTTTACG
Rspo2-B1	GAGGAGGGCAGCAAACGGaaGCCATCTAGGAAGGAGTCAATACAT
Rspo2-B1	TAACAATATGGCGCTTGATCACAAGtaGAAGAGTCTTCCTTTACG
Rspo2-B1	GAGGAGGGCAGCAAACGGaaTCCTTTATTCTTTCTGTTTTCTGGC
Rspo2-B1	TTAGACCTCAAACCTTTCTCCAATTtaGAAGAGTCTTCCTTTACG
Rspo2-B1	GAGGAGGGCAGCAAACGGaaTAACATTGCATTATTTTGCTAAGTG
Rspo2-B1	GCGTTATTTCCAAATGGTTACTACCtaGAAGAGTCTTCCTTTACG
Rspo2-B1	GAGGAGGGCAGCAAACGGaaTTCAAATCCTGGTGTTTCCCAAAGA
Rspo2-B1	GATAAACCATGTATTCTAACTTTGCtaGAAGAGTCTTCCTTTACG
Rspo2-B1	GAGGAGGGCAGCAAACGGaaTACTGTTCAATGTTGGCTATATTTA
Rspo2-B1	AGAGGACAATAATGTGAGTAGAGCTtaGAAGAGTCTTCCTTTACG
Rspo2-B1	GAGGAGGGCAGCAAACGGaaCCCACGAACATACTGCTGACCTGCG
Rspo2-B1	AGAAGAAATTTAGAAAATAATGATTtaGAAGAGTCTTCCTTTACG
Rspo2-B1	GAGGAGGGCAGCAAACGGaaTTCAATCCTTCAAAATGTTTGACAG
Rspo2-B1	AAGAAACTACTTTTACATTAGCACAtaGAAGAGTCTTCCTTTACG
Rspo2-B1	GAGGAGGGCAGCAAACGGaaTTTTGTATTTCAACAGGTTCACGTT
Rspo2-B1	AATCACTTCATGGGCAGCAGTGACCtaGAAGAGTCTTCCTTTACG
Rspo2-B1	GAGGAGGGCAGCAAACGGaaTCCATTACATGATTTCCAAAATGTA
Rspo2-B1	GATACTGTGGCATATTATGTTTAAAtaGAAGAGTCTTCCTTTACG
Rspo2-B1	GAGGAGGGCAGCAAACGGaaTAGCAGAACTCCAATCAGTATCCTC
Rspo2-B1	TAATGTTCTTCATTCTCCTTTTGTTtaGAAGAGTCTTCCTTTACG
Rspo2-B1	GAGGAGGGCAGCAAACGGaaAAATTAAACATAAGGGGTCATTTGT
Rspo2-B1	GATGATTCCAAGCTGTGTGAAGAGTtaGAAGAGTCTTCCTTTACG
Rspo2-B1	GAGGAGGGCAGCAAACGGaaTTTATTACATTGAATTTATAACAAT
Rspo2-B1	ACAGAGGTGCTTACTTCCTCGCAGTtaGAAGAGTCTTCCTTTACG
Rspo2-B1	GAGGAGGGCAGCAAACGGaaTTATTTGCAGGAAGTTGAATGCTTT
Rspo2-B1	ACACATATGCCAAGCTGGACAACATtaGAAGAGTCTTCCTTTACG
Rspo2-B1	GAGGAGGGCAGCAAACGGaaCAAAGCTCCTTCAATTAAAAGACTG
Rspo2-B1	TATGTACATTTTGATATAAGGCTATtaGAAGAGTCTTCCTTTACG
Wnt3a-B1	GAGGAGGGCAGCAAACGGaaGTCAATCAGGGCAGGCGAGGCAGGA
Wnt3a-B1	CTGCCTGCTGCCTGCTGCCTGCGCTtaGAAGAGTCTTCCTTTACG
Wnt3a-B1	GAGGAGGGCAGCAAACGGaaCCCAATCAAGGCCGATTGCCACAGG
Wnt3a-B1	GAACTTTGAAGGCGCTCTGCCGAGAtaGAAGAGTCTTCCTTTACG
Wnt3a-B1	GAGGAGGGCAGCAAACGGaaACACACACGCGCGCACACACGCGCG
Wnt3a-B1	GGTGAAATATTGCACTCACTCACTCtaGAAGAGTCTTCCTTTACG
Wnt3a-B1	GAGGAGGGCAGCAAACGGaaAAAGGCACTGGAGTGCACAGAGAGC
Wnt3a-B1	TTTCTCAGAGGTTACTTGTCTCCCAtaGAAGAGTCTTCCTTTACG
Wnt3a-B1	GAGGAGGGCAGCAAACGGaaTGTGTGCCCGTCTTCTCCGCGTAAA
Wnt3a-B1	AGCAAAGTTTCTTTCCCTTTGGTGAtaGAAGAGTCTTCCTTTACG
Wnt3a-B1	GAGGAGGGCAGCAAACGGaaCCACAAAGAAACAGGGTACATCCAA
Wnt3a-B1	GGGTAACTTGACAGCACTTGCGCCAtaGAAGAGTCTTCCTTTACG
Wnt3a-B1	GAGGAGGGCAGCAAACGGaaTGACCAATGGCTAATGACCACCAAA
Wnt3a-B1	GGCTGTGTGCCCAGGGAAGAGTACTtaGAAGAGTCTTCCTTTACG
Wnt3a-B1	GAGGAGGGCAGCAAACGGaaTCCAGCAGAGGCGATTGCGTGTACA
Wnt3a-B1	ACAGGAGCGGGTTACTGCAAATGCTtaGAAGAGTCTTCCTTTACG
Wnt3a-B1	GAGGAGGGCAGCAAACGGaaGACCATGCTCCCAAACTCCACATCT
Wnt3a-B1	CTCTCTGGCGTCGGCAAACTCTCGCtaGAAGAGTCTTCCTTTACG
Wnt3a-B1	GAGGAGGGCAGCAAACGGaaCATGGCAGACCGAGCATCTGGCCTG
Wnt3a-B1	TCGTCCAGCCTCATTGTTGTGCCGGtaGAAGAGTCTTCCTTTACG
Wnt3a-B1	GAGGAGGGCAGCAAACGGaaCAGGTGCATATGATCAATGATCGAC
Wnt3a-B1	TCCGGATAGCCCATGACATTTGCATtaGAAGAGTCTTCCTTTACG
Wnt3a-B1	GAGGAGGGCAGCAAACGGaaCCACCAGCATGTCTTCACCTCACAG
Wnt3a-B1	GCCAATGACCCTGAAATCTGGCTGAtaGAAGAGTCTTCCTTTACG
Wnt3a-B1	GAGGAGGGCAGCAAACGGaaGCTGTCGTACTTGTCCTTTAGATAG
Wnt3a-B1	ATGCTTCTCCACGACCATTTCAGAGtaGAAGAGTCTTCCTTTACG
Wnt3a-B1	GAGGAGGGCAGCAAACGGaaGGTCTCAACCCAGCCACGGGATTCA
Wnt3a-B1	CTTGAAGAAAGTGTATTTGGGACGTtaGAAGAGTCTTCCTTTACG
Wnt3a-B1	GAGGAGGGCAGCAAACGGaaGAAGGCTATCATTGACTTCCTCAAA
Wnt3a-B1	GCTTTGTCAGGAAAGTTTTCAGCAAtaGAAGAGTCTTCCTTTACG
Wnt3a-B1	GAGGAGGGCAGCAAACGGaaTACTATTCAAATAGTTGAGCCTTTT
Wnt3a-B1	GGGCTGTTCACAAAGTCAACAGACCtaGAAGAGTCTTCCTTTACG
Wnt3a-B1	GAGGAGGGCAGCAAACGGaaTGCAAGGTCAGCATTCGGCTGCATC
Wnt3a-B1	ACCATGTTTTGTGTACTGTTACGCGtaGAAGAGTCTTCCTTTACG
Wnt3a-B1	GAGGAGGGCAGCAAACGGaaATCCCGACTGAAATGTCGTGTTGGG
Wnt3a-B1	TAGCCTACAAAGGTTCACAATGACTtaGAAGAGTCTTCCTTTACG
Wnt3a-B1	GAGGAGGGCAGCAAACGGaaAGAGAGGAAGAATGCTACTCCTTGA
Wnt3a-B1	TCCTACCCCTTCGTACGGTGATGGGtaGAAGAGTCTTCCTTTACG
Wnt3a-B1	GAGGAGGGCAGCAAACGGaaGCTTGTCTTCAGAGCTCCCTTCACA
Wnt3a-B1	ACCACCTTCCGTCTTCGTCTTGCATtaGAAGAGTCTTCCTTTACG
Wnt3a-B1	GAGGAGGGCAGCAAACGGaaATTCACCCTGGTCGCATGCTTGGTA
Wnt3a-B1	TCAACCACAGTGGAAACTGAAGACAtaGAAGAGTCTTCCTTTACG
Wnt3a-B1	GAGGAGGGCAGCAAACGGaaAACAGTCATGATCTTAAGAGTTCTG
Wnt3a-B1	CCGGTTCTGTCTTGGTGCTCGATCAtaGAAGAGTCTTCCTTTACG
Wnt3a-B1	GAGGAGGGCAGCAAACGGaaTTCCTGGGAGGCTTCAGGATGAAGA
Wnt3a-B1	GATCCTTTCTCTAGTGATGATAGATtaGAAGAGTCTTCCTTTACG
Wnt3a-B1	GAGGAGGGCAGCAAACGGaaTACATGTTGCATGTTGTCCTAAGAG
Wnt3a-B1	CTGCAATGCATGGAGAATCCCAAAGtaGAAGAGTCTTCCTTTACG
Wnt3a-B1	GAGGAGGGCAGCAAACGGaaATGGCACATCCATTCAGCCTTTCTA
Wnt3a-B1	GGGGATTTTAAAATCTACACTTAAAtaGAAGAGTCTTCCTTTACG
Wnt3a-B1	GAGGAGGGCAGCAAACGGaaTTTAATCCAGTGTTTAAATGTGCTT
Wnt3a-B1	AGCACTGTTCTACACAGTTTGTATTtaGAAGAGTCTTCCTTTACG
Wnt3a-B1	GAGGAGGGCAGCAAACGGaaTTTAAGTGAGAGAATAAGCTGATAA
Wnt3a-B1	TTTTATAAATACACAGAAACTGCTGtaGAAGAGTCTTCCTTTACG
Wnt3a-B1	GAGGAGGGCAGCAAACGGaaAATAGGACTGTTATTCAGTCTGCAA
Wnt3a-B1	TATTCTGCAGCTACACCTGTTCTGCtaGAAGAGTCTTCCTTTACG
Wnt3a-B1	GAGGAGGGCAGCAAACGGaaTTGACTAAATACTGCTTAGCAGAAA
Wnt3a-B1	TGTTAAACTATGTTTATTGCAACACtaGAAGAGTCTTCCTTTACG
Wnt3a-B1	GAGGAGGGCAGCAAACGGaaAACAAATTGCTGTATTATTCAGTAC
Wnt3a-B1	AATGAAGGTATGCCACTCCCTTCCTtaGAAGAGTCTTCCTTTACG
Dlx5-B5	CTCACTCCCAATCTCTATaaGCACTTTCAGCAGCAGCAGAAGGCT
Dlx5-B5	TGTGTGAGGGGCTGTGCGACGCGCCaaCTACCCTACAAATCCAAT
Dlx5-B5	CTCACTCCCAATCTCTATaaAGCCATGCTGGAGTCCTGTGTACTG
Dlx5-B5	TCGCTGGAGGTGGAGGGGCGCTCAGaaCTACCCTACAAATCCAAT
Dlx5-B5	CTCACTCCCAATCTCTATaaGCGCTCGTACACTGCTGTCATCCCT
Dlx5-B5	GCTGGCTCGGATGGTGGTGGGGAGCaaCTACCCTACAAATCCAAT
Dlx5-B5	CTCACTCCCAATCTCTATaaCGTTGAGCGCCTTGCCGTAGGCGGC
Dlx5-B5	TGCCGTGGTGGTACTGGTACTGGTAaaCTACCCTACAAATCCAAT
Dlx5-B5	CTCACTCCCAATCTCTATaaCGGGGTAGTTCCCGGCGGAGCCGTT
Dlx5-B5	CGTAGCTGTACTCCGCGTACGCCTTaaCTACCCTACAAATCCAAT
Dlx5-B5	CTCACTCCCAATCTCTATaaGGTGGTGGTGCGGGTGGTAGGGACT
Dlx5-B5	AGGCTCCACTGTACTGCGGGTGGTGaaCTACCCTACAAATCCAAT
Dlx5-B5	CTCACTCCCAATCTCTATaaTGGACGTGCGGGTGCTGGCTGAGGG
Dlx5-B5	GGGTTGGACGTCTGCACGTGGTGGCaaCTACCCTACAAATCCAAT
Dlx5-B5	CTCACTCCCAATCTCTATaaTGGGCGTCTCCAGGTAGCTGGAGGC
Dlx5-B5	TGGAGCTGGCGGCGGAGTACCAGGCaaCTACCCTACAAATCCAAT
Dlx5-B5	CTCACTCCCAATCTCTATaaCAGCGGGTGCTGCAGGGAGCTGTGC
Dlx5-B5	CTAGTACAGTGTCCCAGACGCCAGTaaCTACCCTACAAATCCAAT
Dlx5-B5	CTCACTCCCAATCTCTATaaATTGTCCGGCAGATCCGTCCGCCCC
Dlx5-B5	CGAGACCGACCTACTTGGATTGTCCaaCTACCCTACAAATCCAAT
Dlx5-B5	CTCACTCCCAATCTCTATaaCCCTTCCCCGGCCCACCAGCCTTTC
Dlx5-B5	CTCCCCATCAGACATTGGGCGGGCGaaCTACCCTACAAATCCAAT
Dlx5-B5	CTCACTCCCAATCTCTATaaTAAGGGTATGGGCAGGCCCCGGGTG
Dlx5-B5	CCACGAGAGCAGGGCCAGGTTGGCCaaCTACCCTACAAATCCAAT
Dlx5-B5	CTCACTCCCAATCTCTATaaTGAAAGTGTCCACAGTTGCACGAGT
Dlx5-B5	TTGAGGTCATAGATGTCAAGGCACCaaCTACCCTACAAATCCAAT
Dlx5-B5	CTCACTCCCAATCTCTATaaCAGGGTTAAAATAAAGGTTGACAAA
Dlx5-B5	GTTAATTCATCTATCTACACGTATGaaCTACCCTACAAATCCAAT
Dlx5-B5	CTCACTCCCAATCTCTATaaAATAATTTTATTTATCCAGAATATA
Dlx5-B5	CATATCAGAAGCTTTAATCATGGCCaaCTACCCTACAAATCCAAT
Sp8-B2	CCTCGTAAATCCTCATCAaaTCTCCATATGCGGGGCCCTCCCCGC
Sp8-B2	CGTTGCTGCGTGAGCTCATCAGCGCaaATCATCCAGTAAACCGCC
Sp8-B2	CCTCGTAAATCCTCATCAaaGCTGAGCGGCGAGCAGCCAATCAGC
Sp8-B2	TAGCTCTTCCCAGGGCTTTGAAGTGaaATCATCCAGTAAACCGCC
Sp8-B2	CCTCGTAAATCCTCATCAaaATATTTATAAATCAGAGGAGTGTTT
Sp8-B2	AAGTGCCCTCCTCAGAGGATCTTTTaaATCATCCAGTAAACCGCC
Sp8-B2	CCTCGTAAATCCTCATCAaaGGGCCGCCGCAGCTGAAAGAGTCCG
Sp8-B2	GTCAGGGAGAAGGCGCTGGAGCCGCaaATCATCCAGTAAACCGCC
Sp8-B2	CCTCGTAAATCCTCATCAaaCACTCGAGCAGCCCGTTGCGGTGGG
Sp8-B2	CATGTCCTGTACACAGTGGCCGGCAaaATCATCCAGTAAACCGCC
Sp8-B2	CCTCGTAAATCCTCATCAaaGCCAGAGATGGCGAATCGTGTCTCT
Sp8-B2	GAGGTCACTTGCCACAGAGTCGGCCaaATCATCCAGTAAACCGCC
Sp8-B2	CCTCGTAAATCCTCATCAaaTGCTGCCATGATTGTGCGGTGGGTG
Sp8-B2	GGCACTGTCCAGCCTGGCTCCTGCGaaATCATCCAGTAAACCGCC
Sp8-B2	CCTCGTAAATCCTCATCAaaCAAATGTCCCAGCAAGCTGGCCGCG
Sp8-B2	GAGGAGCTGTATCAACAGTGGCCTTaaATCATCCAGTAAACCGCC
Sp8-B2	CCTCGTAAATCCTCATCAaaGAAATTCGTGTGTATTCCTTGTTTT
Sp8-B2	GTGAAGCCATCGGGTCCATTCGCAGaaATCATCCAGTAAACCGCC
Sp8-B2	CCTCGTAAATCCTCATCAaaGCCCTTGGAGTTCTGTTCGCCTCTC
Sp8-B2	GGGTACACACTTCGACTCAATTGCAaaATCATCCAGTAAACCGCC
Sp8-B2	CCTCGTAAATCCTCATCAaaGTGTCCTCGGAGCACTGTGTACGTT
Sp8-B2	CATACTGTACCACAAACAATGTTTAaaATCATCCAGTAAACCGCC
Sp8-B2	CCTCGTAAATCCTCATCAaaGGTTCTAGGCGGGTGTGTGTGTGTG
Sp8-B2	GAGGTCTTCTGCATTTTAAAGTGAAaaATCATCCAGTAAACCGCC
Sp8-B2	CCTCGTAAATCCTCATCAaaTTTCAGGCTGGCCCCTCTAACAAAA
Sp8-B2	GAGGACAAATGCCTTCCCTTCCAGCaaATCATCCAGTAAACCGCC
Sp8-B2	CCTCGTAAATCCTCATCAaaACTTCCACTGCTGACAAAATGGACA
Sp8-B2	TCGAGTGGAAAGAGATCCGGAGATTaaATCATCCAGTAAACCGCC
Sp8-B2	CCTCGTAAATCCTCATCAaaTAAATGAGCGGCGGACAATTGAGGC
Sp8-B2	GGTGAATGTGTGTTGCATGACTGTAaaATCATCCAGTAAACCGCC
Sp8-B2	CCTCGTAAATCCTCATCAaaACACACAGCAAGCTTAATCCTAAAC
Sp8-B2	AAATCTTGCTCTCGCTCACAGAGGCaaATCATCCAGTAAACCGCC
Sp8-B2	CCTCGTAAATCCTCATCAaaCCTGCTATACTTTCGACCTGTGCGT
Sp8-B2	CAGCCTATAATATTTCGTTTTAAGCaaATCATCCAGTAAACCGCC
Sp8-B2	CCTCGTAAATCCTCATCAaaTTTTATGTCACACATTGTTGCTTTT
Sp8-B2	TGACCCCGGATGTTCGCATCGCTCAaaATCATCCAGTAAACCGCC
Sp8-B2	CCTCGTAAATCCTCATCAaaGTGTGTTTCATTGGCTAATCGAAAG
Sp8-B2	ACCTCGAACCTGCTCATTGATTGGGaaATCATCCAGTAAACCGCC
Sp8-B2	CCTCGTAAATCCTCATCAaaATACTATACAAAATCGACTCCTGGA
Sp8-B2	ATTTACTGGGAATAATGTACAAGAAaaATCATCCAGTAAACCGCC
Sp8-B2	CCTCGTAAATCCTCATCAaaAACCTCAAATGTACTTCAATATATT
Sp8-B2	CTCTTAATATCGGGTCGTGACAAAAaaATCATCCAGTAAACCGCC
Sp8-B2	CCTCGTAAATCCTCATCAaaAACTATATCTTGAAAGTGCATGTAT
Sp8-B2	CGCGATCTAAACTCATATTCAAGCAaaATCATCCAGTAAACCGCC
Sp8-B2	CCTCGTAAATCCTCATCAaaCATTTATCAAATAATTACATCTGTA
Sp8-B2	TGCTGCATTAAATCAAATGCCATCCaaATCATCCAGTAAACCGCC
Sp8-B2	CCTCGTAAATCCTCATCAaaCTGCACTGTCAGCGATAGCAAAGTA
Sp8-B2	AGAGGAGAATTCTCACTTCAGCTCGaaATCATCCAGTAAACCGCC
Sp8-B2	CCTCGTAAATCCTCATCAaaGAGCGTCGGACCCACTAGTTGAGAA
Sp8-B2	ACACTCGGACAGTTTATTCAGAAATaaATCATCCAGTAAACCGCC
Sp8-B2	CCTCGTAAATCCTCATCAaaTACACACAGGCCACAGTCAGTTCGT
Sp8-B2	TGTGTGTGTGGTCACCTTGCCAGGAaaATCATCCAGTAAACCGCC
Sp8-B2	CCTCGTAAATCCTCATCAaaCAGGTGTGACAGCAGAGTGTGTGCG
Sp8-B2	ATTCCGTTTGCAGCGTGTCGCAAACaaATCATCCAGTAAACCGCC
Sp8-B2	CCTCGTAAATCCTCATCAaaCAAATTATTTCAACATTACAACGAG
Sp8-B2	AGGTTTTCCATTTCAATGTGAAATAaaATCATCCAGTAAACCGCC
Sp8-B2	CCTCGTAAATCCTCATCAaaAATGCAATTTAAAATGTTCCAGCGT
Sp8-B2	AAAACCAATTAAATTTCATGCATTTaaATCATCCAGTAAACCGCC
Sp8-B2	AGGTTTTCCATTTCAATGTGAAATAaaATCATCCAGTAAACCGCC
Sp8-B2	CCTCGTAAATCCTCATCAaaAATGCAATTTAAAATGTTCCAGCGT
Sp8-B2	AAAACCAATTAAATTTCATGCATTTaaATCATCCAGTAAACCGCC
Axin2-B5	CTCACTCCCAATCTCTATaaGCTGTCTGGAGTGCTGAGCGGCAAC
Axin2-B5	AGGATGCAGCATCGACTGGGCTTCTaaCTACCCTACAAATCCAAT
Axin2-B5	CTCACTCCCAATCTCTATaaGTAGCTGCCAGCAGGTAGGAGGGCG
Axin2-B5	ATCCAGGATAGCTTGTGGGTCATCTaaCTACCCTACAAATCCAAT
Axin2-B5	CTCACTCCCAATCTCTATaaTGTCTTCAGCACCCGTGACAAGTGA
Axin2-B5	GGCCACCCCAGGAGACTGGCAGACGaaCTACCCTACAAATCCAAT
Axin2-B5	CTCACTCCCAATCTCTATaaGGGCAAACACCGGCAGTGGCTTTCC
Axin2-B5	CAAATCCCTTGGCTATGACCGGGCAaaCTACCCTACAAATCCAAT
Axin2-B5	CTCACTCCCAATCTCTATaaGCACATGCTTTGTAGTCTGCTTGGT
Axin2-B5	CATTATGGTGGTGGATGTAGTAATGaaCTACCCTACAAATCCAAT
Axin2-B5	CTCACTCCCAATCTCTATaaCCTCCAGCTGCTCCTTCGTTTTAGG
Axin2-B5	AGCACTGTGCGCGACGTGCAGCCTCaaCTACCCTACAAATCCAAT
Axin2-B5	CTCACTCCCAATCTCTATaaTTTAAATAGCAGCAATAGTCCGTGC
Axin2-B5	TCAGTGCCCTTGGGATGGCCTTTGCaaCTACCCTACAAATCCAAT
Axin2-B5	CTCACTCCCAATCTCTATaaAAGGGTTCCGTGGGTCCTGGGGATA
Axin2-B5	CTCTTTAAAAGTGTGCCGATCTTACaaCTACCCTACAAATCCAAT
Axin2-B5	CTCACTCCCAATCTCTATaaTGGCGCTCCGCCACCACCTTACCGT
Axin2-B5	GCGAGGGGACCACTATCACTTGAACaaCTACCCTACAAATCCAAT
Axin2-B5	CTCACTCCCAATCTCTATaaTTGGCTGTCAACGGGAGTCCGGGTG
Axin2-B5	CAGACGTTCTGGGATCGGTCAGCATaaCTACCCTACAAATCCAAT
Axin2-B5	CTCACTCCCAATCTCTATaaTGCCTCTCGCTCTCCAGCATCCACT
Axin2-B5	TGCATGCTATGGGGTTTGTGCTTGTaaCTACCCTACAAATCCAAT
Axin2-B5	CTCACTCCCAATCTCTATaaTCCGAGCTGTACACTTTCTTTGCAC
Axin2-B5	CGGTCACATGCCAAAACCCGTGCAGaaCTACCCTACAAATCCAAT
Axin2-B5	CTCACTCCCAATCTCTATaaCGCCACTGACTGATGTGTGGTGACG
Axin2-B5	GAGCAGGCTGGGCGTTCCGGGTATGaaCTACCCTACAAATCCAAT
Axin2-B5	CTCACTCCCAATCTCTATaaGCATGGCAGGGTCCTGAACGAATGG
Axin2-B5	CTAATGTATTCGGCGGAGGGAGCGGaaCTACCCTACAAATCCAAT
Axin2-B5	CTCACTCCCAATCTCTATaaATCGCCGGCAAGCTTCCTCCAGCTG
Axin2-B5	GCTTTGGAGGCTTGGACCCTTCAGTaaCTACCCTACAAATCCAAT
Axin2-B5	CTCACTCCCAATCTCTATaaTTGGCATCGTCGTCACGGCGCACCA
Axin2-B5	CCTGGGCAACAGGGTGACTTCGATCaaCTACCCTACAAATCCAAT
Axin2-B5	CTCACTCCCAATCTCTATaaCACAGGCTTCTTTGTCTCCTTGTTG
Axin2-B5	TTCGGTAGGCTGAGGAGCCGGGCCCaaCTACCCTACAAATCCAAT
Axin2-B5	CTCACTCCCAATCTCTATaaGCCACAAAAGAAGTAAGTGACGACC
Axin2-B5	CAGCAGCCTCCGGTATGGGATTTCTaaCTACCCTACAAATCCAAT
Axin2-B5	CTCACTCCCAATCTCTATaaTTGCTCAGCTGCTCCTTGAAGTGTC
Axin2-B5	TTGAAGTAATACCTGTAGCTGCCTTaaCTACCCTACAAATCCAAT
Axin2-B5	CTCACTCCCAATCTCTATaaCCGCAGTCGAATTCGGTGCTTGGCT
Axin2-B5	TCTTCCCAGATTTCTTCAAACACGGaaCTACCCTACAAATCCAAT
Axin2-B5	CTCACTCCCAATCTCTATaaCCTTCGTACATCGGTAGCATGGAGT
Axin2-B5	ATCCGCTCCACTTTACCAAGAATCCaaCTACCCTACAAATCCAAT
Axin2-B5	CTCACTCCCAATCTCTATaaCTCGTGTCCTCCTAAACGTGCTAAT
Axin2-B5	TTTCCTTCAAAGGTTCAGCGCTCTCaaCTACCCTACAAATCCAAT
Axin2-B5	CTCACTCCCAATCTCTATaaCCCGCCACCCAAAACATTCTTCATT
Axin2-B5	CCATTGGCTCCTTGTGGCCCGCCCCaaCTACCCTACAAATCCAAT
Axin2-B5	CTCACTCCCAATCTCTATaaCCGAGTTTCTAAGGCTGATCAGTTT
Axin2-B5	TAGCTCATGGGTATAGAATGCCACTaaCTACCCTACAAATCCAAT
Axin2-B5	CTCACTCCCAATCTCTATaaATAGAAGTCTTCCCTTATCTCTGTA
Axin2-B5	GACAGTGGTCATATTTTAAATAAATaaCTACCCTACAAATCCAAT
Axin2-B5	CTCACTCCCAATCTCTATaaATGTTTGGAAGTCTTTTACATGTGG
Axin2-B5	TTTCAGATCCCTGGAAAGTCATATAaaCTACCCTACAAATCCAAT
Axin2-B5	CTCACTCCCAATCTCTATaaTCCTCGGGTCATGTATAAACATTTT
Axin2-B5	TGTTCAATAAATATCAATTAAGTTTaaCTACCCTACAAATCCAAT
Axin2-B5	CTCACTCCCAATCTCTATaaTCCGTAAATTGGACTTAAGGGGACG
Axin2-B5	TTTCTTCTCTATTGGTAAAGCAGCAaaCTACCCTACAAATCCAAT
Axin2-B5	CTCACTCCCAATCTCTATaaCAGATTCTCTCAGTCACTTGCACAC
Axin2-B5	GAGGAATACGACATCACTCTTCTCTaaCTACCCTACAAATCCAAT
Axin2-B5	CTCACTCCCAATCTCTATaaCCCAAAGTTAACATTCCAAATTCAT
Axin2-B5	CTTGTCCCATGCTAAATCGATAATGaaCTACCCTACAAATCCAAT
Sp6-B1	GAGGAGGGCAGCAAACGGaaTTTCCCAAACGGAGCCACTCCCACC
Sp6-B1	GTGACTCACAACTGCCTTCACTCCCtaGAAGAGTCTTCCTTTACG
Sp6-B1	GAGGAGGGCAGCAAACGGaaCAGCCGGGGAAGCAGTCGAGGGAGT
Sp6-B1	CGCTTGTGACCTGAGGCAGGTGAGCtaGAAGAGTCTTCCTTTACG
Sp6-B1	GAGGAGGGCAGCAAACGGaaGCAATCCAGGTAGCGCGTCGCAGAG
Sp6-B1	CCTGAACTCCTGGCTCCGCGTCGGGtaGAAGAGTCTTCCTTTACG
Sp6-B1	GAGGAGGGCAGCAAACGGaaTTGGCTCCCACGCTGCGGCTGCTGC
Sp6-B1	GGGTCTACTGGTGCCTCCCTGGTCGtaGAAGAGTCTTCCTTTACG
Sp6-B1	GAGGAGGGCAGCAAACGGaaGAAGGTGGTCGAAGTCTCCTGGGGA
Sp6-B1	GTTAGCATTGCCGAAATCCGGGGTTtaGAAGAGTCTTCCTTTACG
Sp6-B1	GAGGAGGGCAGCAAACGGaaTGATTCCCAAGGGAGCTACATACAG
Sp6-B1	GAGGAGGCGTGGGGTGTGTCGGAGCtaGAAGAGTCTTCCTTTACG
Sp6-B1	GAGGAGGGCAGCAAACGGaaTGCAGCGGCTGCAGGTCCAGATCTG
Sp6-B1	TCAGATCCACTGTGGAGCTGGTATGtaGAAGAGTCTTCCTTTACG
Sp6-B1	GAGGAGGGCAGCAAACGGaaTGAAGCTGGGACTGGTAGTTGCCTC
Sp6-B1	ATGGACAGATCATGCAGCAACGGCGtaGAAGAGTCTTCCTTTACG
Sp6-B1	GAGGAGGGCAGCAAACGGaaGAGGGTGAGTACTGGTGGTCCGAGT
Sp6-B1	CCCGAGTTGTGAGACTCATAGCGACtaGAAGAGTCTTCCTTTACG
Sp6-B1	GAGGAGGGCAGCAAACGGaaCCCTCCAGATCCTCACAGTTCACTC
Sp6-B1	AAGTGTCCCACTTCCAGGTGGTCGTtaGAAGAGTCTTCCTTTACG
Sp6-B1	GAGGAGGGCAGCAAACGGaaTCCATGGAGGGATGCAGGAGCTTTG
Sp6-B1	AACCATGGTTCGTAGTGATGGGCCAtaGAAGAGTCTTCCTTTACG
Sp6-B1	GAGGAGGGCAGCAAACGGaaCCCTTCGTCGCCGGAGTTACTCGGG
Sp6-B1	ATGCAGGTCCCACCAGGGCGACATGtaGAAGAGTCTTCCTTTACG
Sp6-B1	GAGGAGGGCAGCAAACGGaaCTGTAGGTCCATCCAGCTGGAGCTG
Sp6-B1	TGGCAACTGAAGTCCACCTTGGCCAtaGAAGAGTCTTCCTTTACG
Sp6-B1	GAGGAGGGCAGCAAACGGaaAGCTGCCGAGGGTTTGCTGAAGTCC
Sp6-B1	GAGTACACATCTGGTGCTCTGATCCtaGAAGAGTCTTCCTTTACG
Sp6-B1	GAGGAGGGCAGCAAACGGaaGGGCAGAGGAGATCATGTGTTGAGG
Sp6-B1	TAAATCCTTCCTGGCCAAGCAGATGtaGAAGAGTCTTCCTTTACG
Sp6-B1	GAGGAGGGCAGCAAACGGaaGGGTTCCGTTGCAGTGCCCTTGTTC
Sp6-B1	ATCGGGATCGCGCTTGGCTTTCCCAtaGAAGAGTCTTCCTTTACG
Sp6-B1	GAGGAGGGCAGCAAACGGaaCCCCAGGCACAGGCTCAGTTCACTT
Sp6-B1	TCCGATAGAGGCCATCTGTGGCGGGtaGAAGAGTCTTCCTTTACG
Sp6-B1	GAGGAGGGCAGCAAACGGaaCTAGAGCTAGGCAGCAGGTGTGAAC
Sp6-B1	AACCAGTCAAGTCCCAGTGAGAAACtaGAAGAGTCTTCCTTTACG
Sp6-B1	GAGGAGGGCAGCAAACGGaaTGAAGGCAAGGTGAAAGTCTGTGAG
Sp6-B1	AGAACCGAGGGGCTCTGGGCACATTtaGAAGAGTCTTCCTTTACG
Sp6-B1	GAGGAGGGCAGCAAACGGaaATTCTACAGGCAGTCTGTCCTCGCC
Sp6-B1	TGGTGCTGAAAGTTCATAGTTTACGtaGAAGAGTCTTCCTTTACG
Sp6-B1	GAGGAGGGCAGCAAACGGaaCACTACACAAATAAATAAACCCTAG
Sp6-B1	TAACGTCTACAAACTGTCCCCTTCTtaGAAGAGTCTTCCTTTACG
Sp6-B1	GAGGAGGGCAGCAAACGGaaCCATAACAAAATGTACAGTGTCCCC
Sp6-B1	CTGCATCCAGGCTTTCTCCCATCCCtaGAAGAGTCTTCCTTTACG
Sp6-B1	GAGGAGGGCAGCAAACGGaaTGCGATCAAAGACCAACTTCACAGC
Sp6-B1	TTGTCTTCACCTTCCCACAGAACCCtaGAAGAGTCTTCCTTTACG
Sp6-B1	GAGGAGGGCAGCAAACGGaaAAGACGTGGCACAGCCATCTATTTT
Sp6-B1	CTGACCTACATACTGCCTGTATCGAtaGAAGAGTCTTCCTTTACG
Sp6-B1	GAGGAGGGCAGCAAACGGaaCCTGCCTACCGAAGCAGGAGAAAGT
Sp6-B1	GGTACATGAGGCCACTGGCGCTACGtaGAAGAGTCTTCCTTTACG
Sp6-B1	GAGGAGGGCAGCAAACGGaaTGTCGTAGTGAAGTTAAGGCCAACC
Sp6-B1	AATGGCCTATCATTGGGATCCCTATtaGAAGAGTCTTCCTTTACG
Sp6-B1	GAGGAGGGCAGCAAACGGaaTTACATGATAACGGGTTTTACACAT
Sp6-B1	TTTATTAGCATGTTGCAGAATCGCTtaGAAGAGTCTTCCTTTACG
Sp6-B1	GAGGAGGGCAGCAAACGGaaGGGGTTAGCGCCCCTTTTCAATTTC
Sp6-B1	CTTCAACTTTTGCTTATTTTGTTAAtaGAAGAGTCTTCCTTTACG
Sp6-B1	GAGGAGGGCAGCAAACGGaaCCACCACCACCACCCTTTAAACACT
Sp6-B1	TGTAATCCCCATGGACGGGTGCCGCtaGAAGAGTCTTCCTTTACG
Sp6-B1	GAGGAGGGCAGCAAACGGaaAGCAATGGCTAACTCAATCTTTCTG
Sp6-B1	GGCCGACAGCAGTGGTCAGTTCGGGtaGAAGAGTCTTCCTTTACG
