# Supplementary figures and images for: Canonical Wnt signaling and the regulation of divergent mesenchymal Fgf8 expression in axolotl limb development and regeneration
Source: eLife journal article supplement (doi:10.7554/elife.79762), 2022-05-19

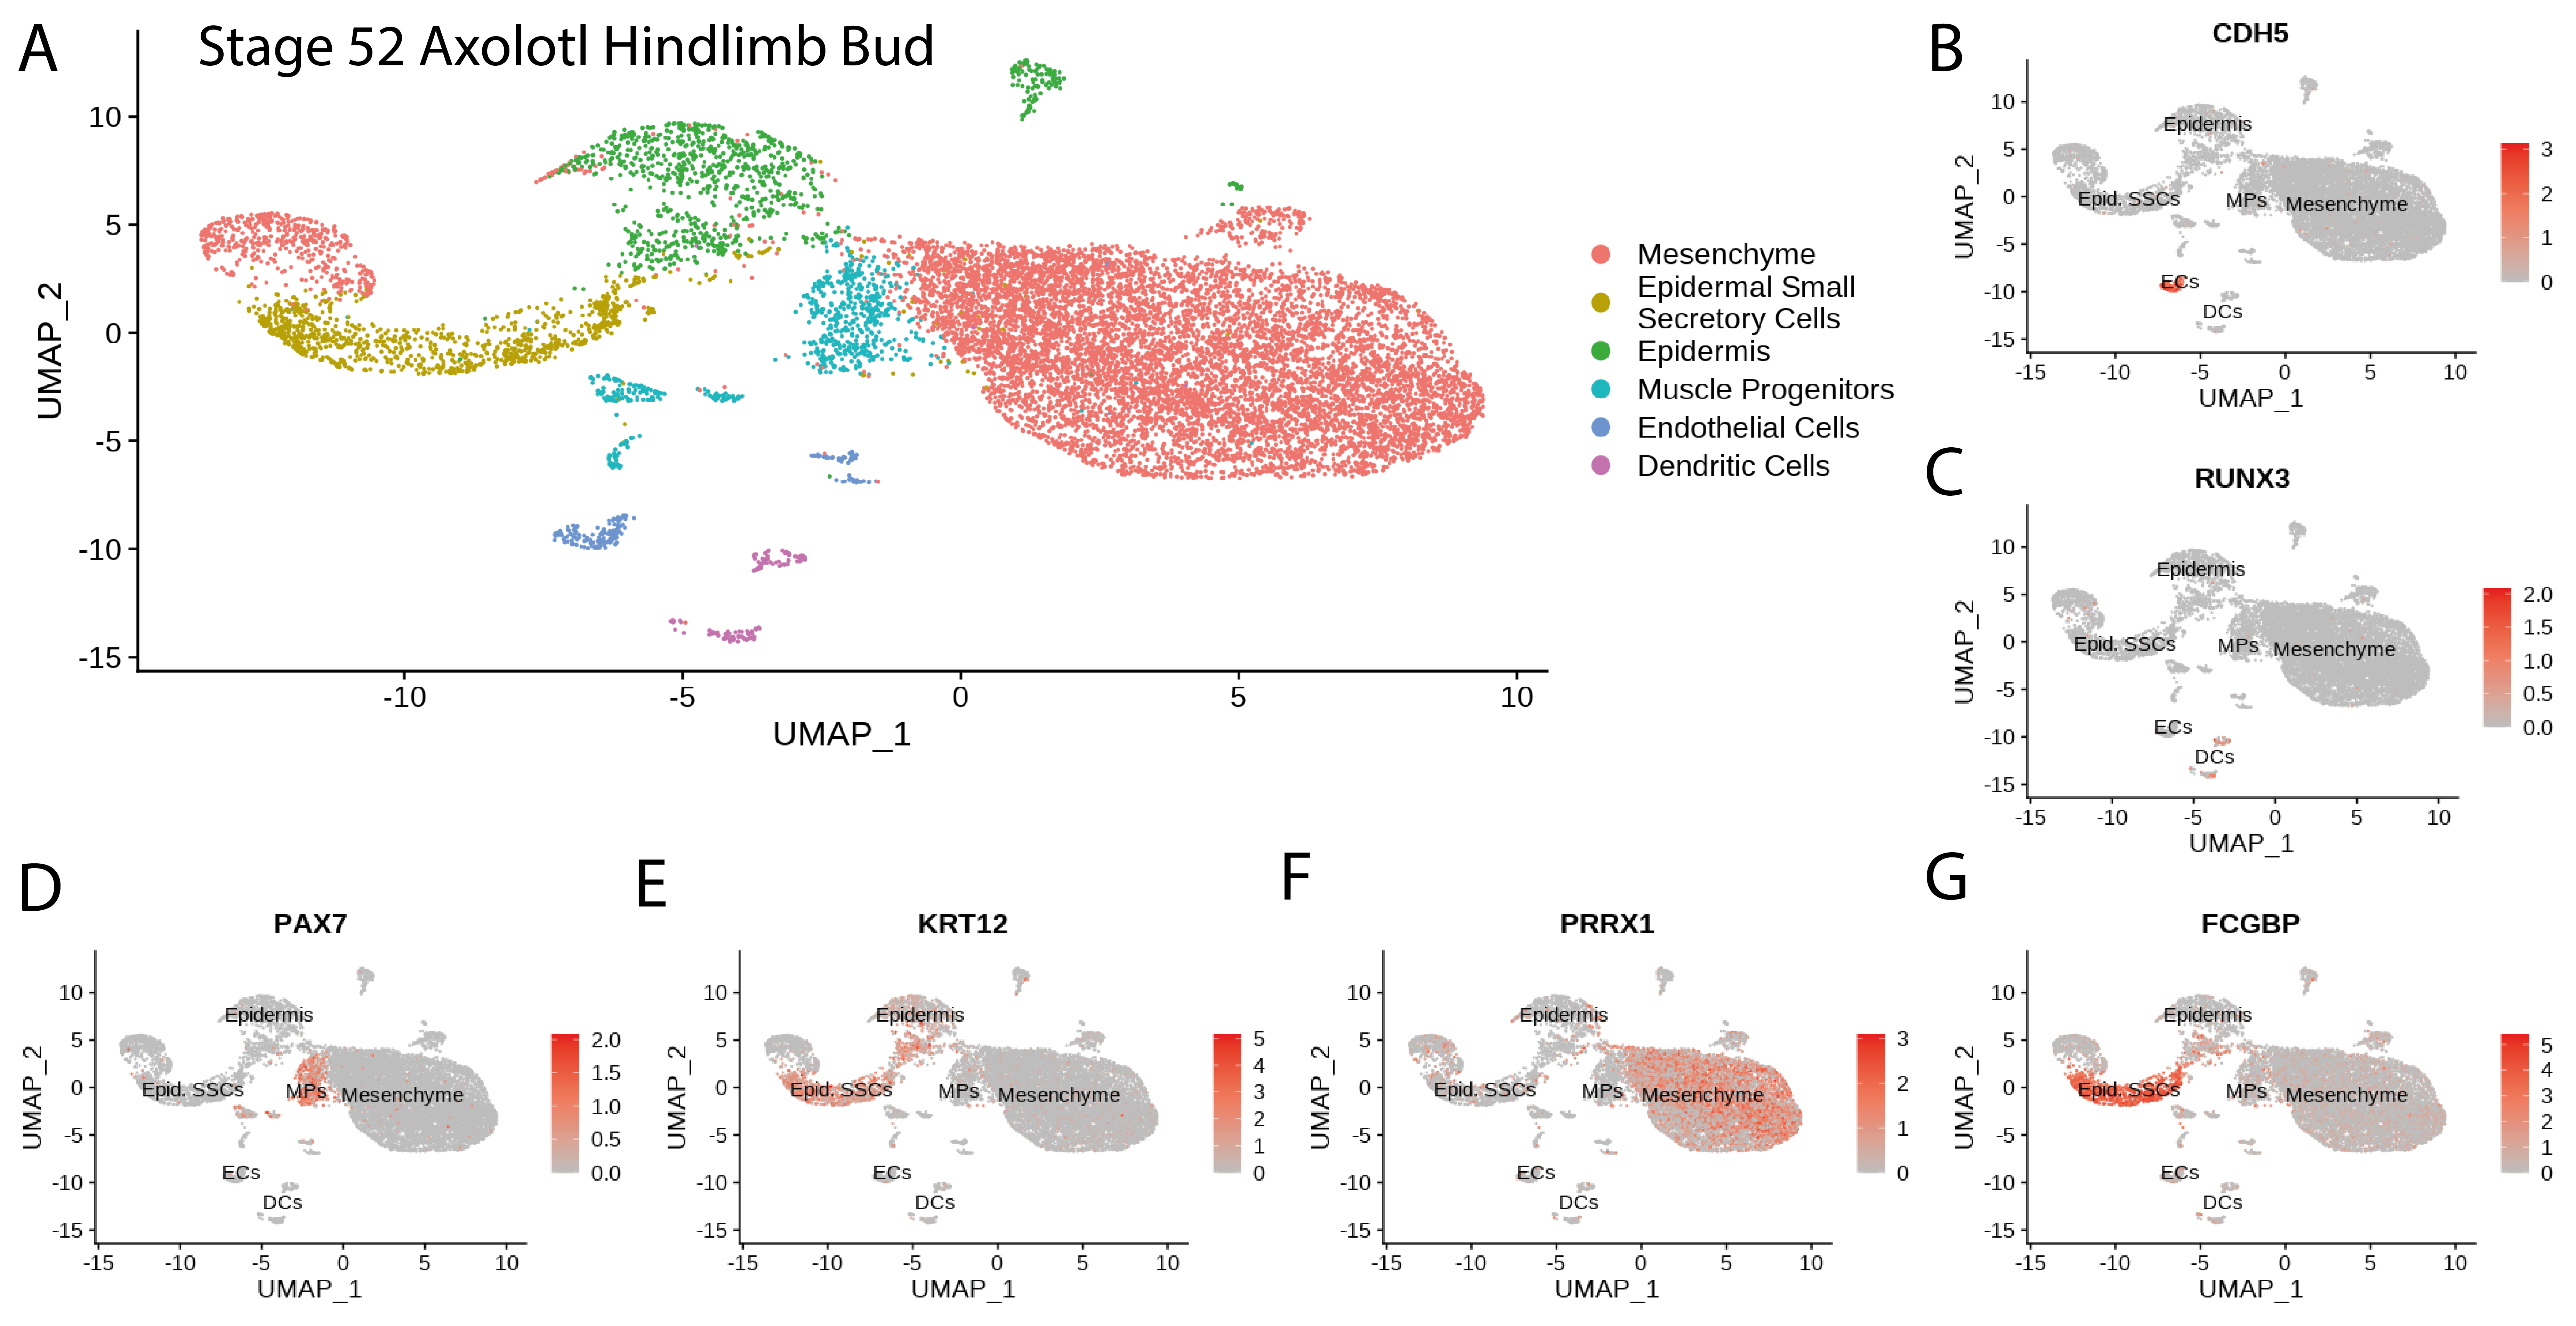

Supplement: supp [file elife-79762-supp-v1.zip › elife_poa_e79762_Figure_1_figure_supplement_1.png]

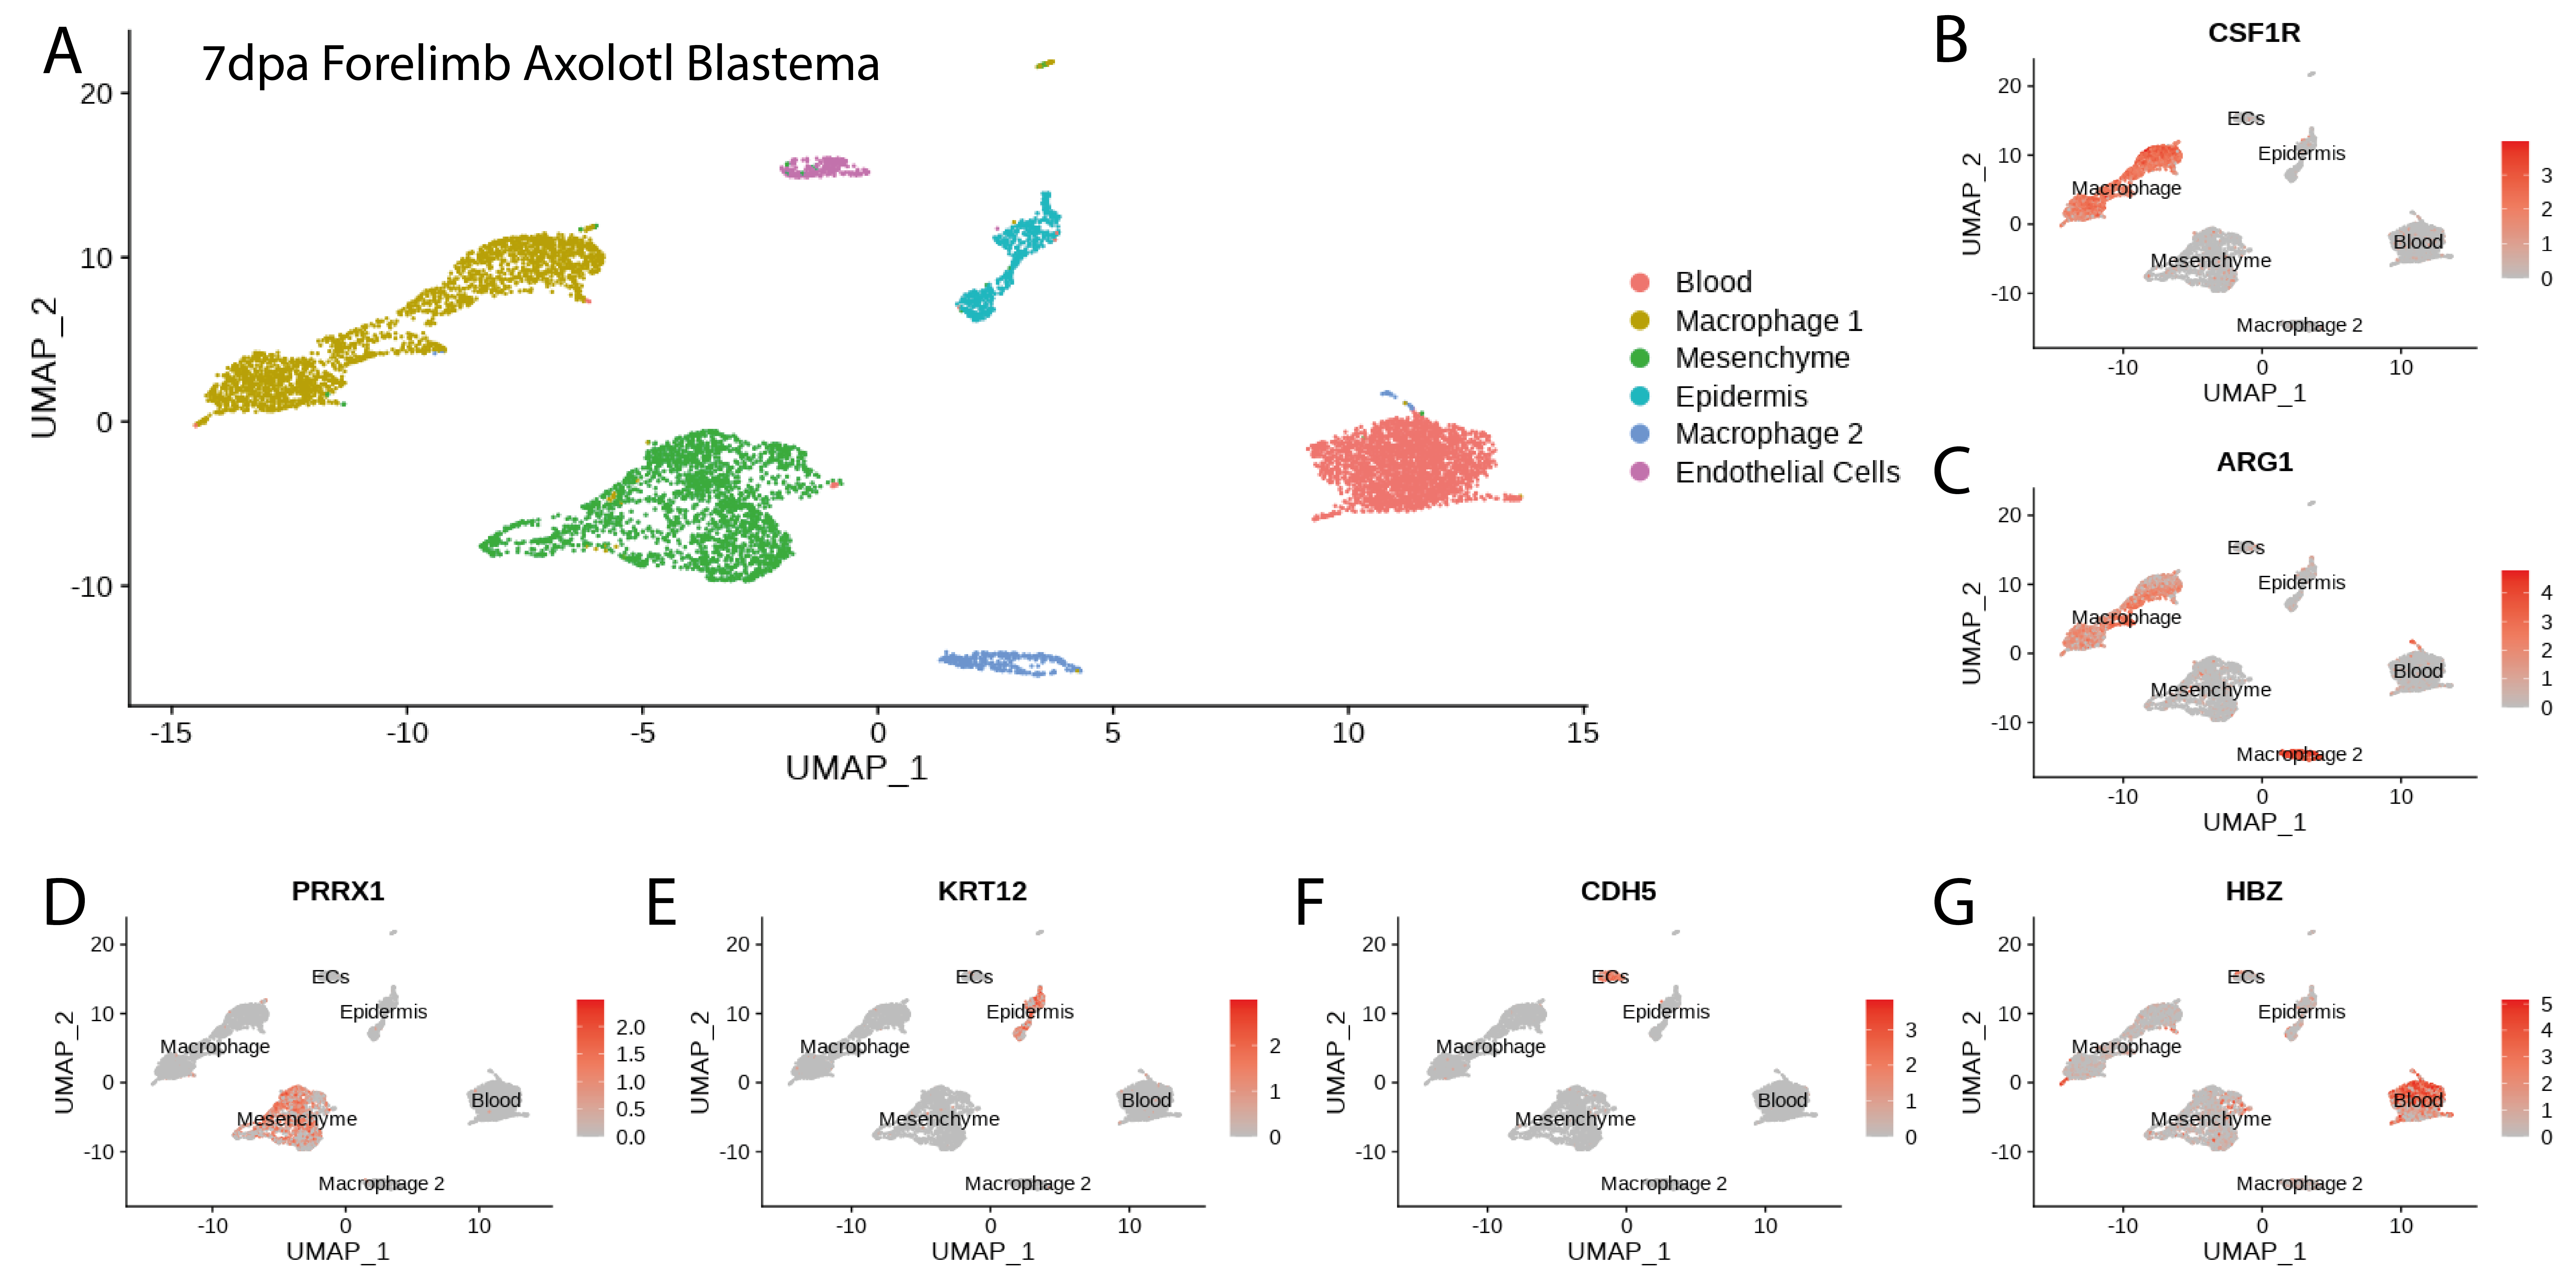

Supplement: supp [file elife-79762-supp-v1.zip › elife_poa_e79762_Figure_1_figure_supplement_2.png]

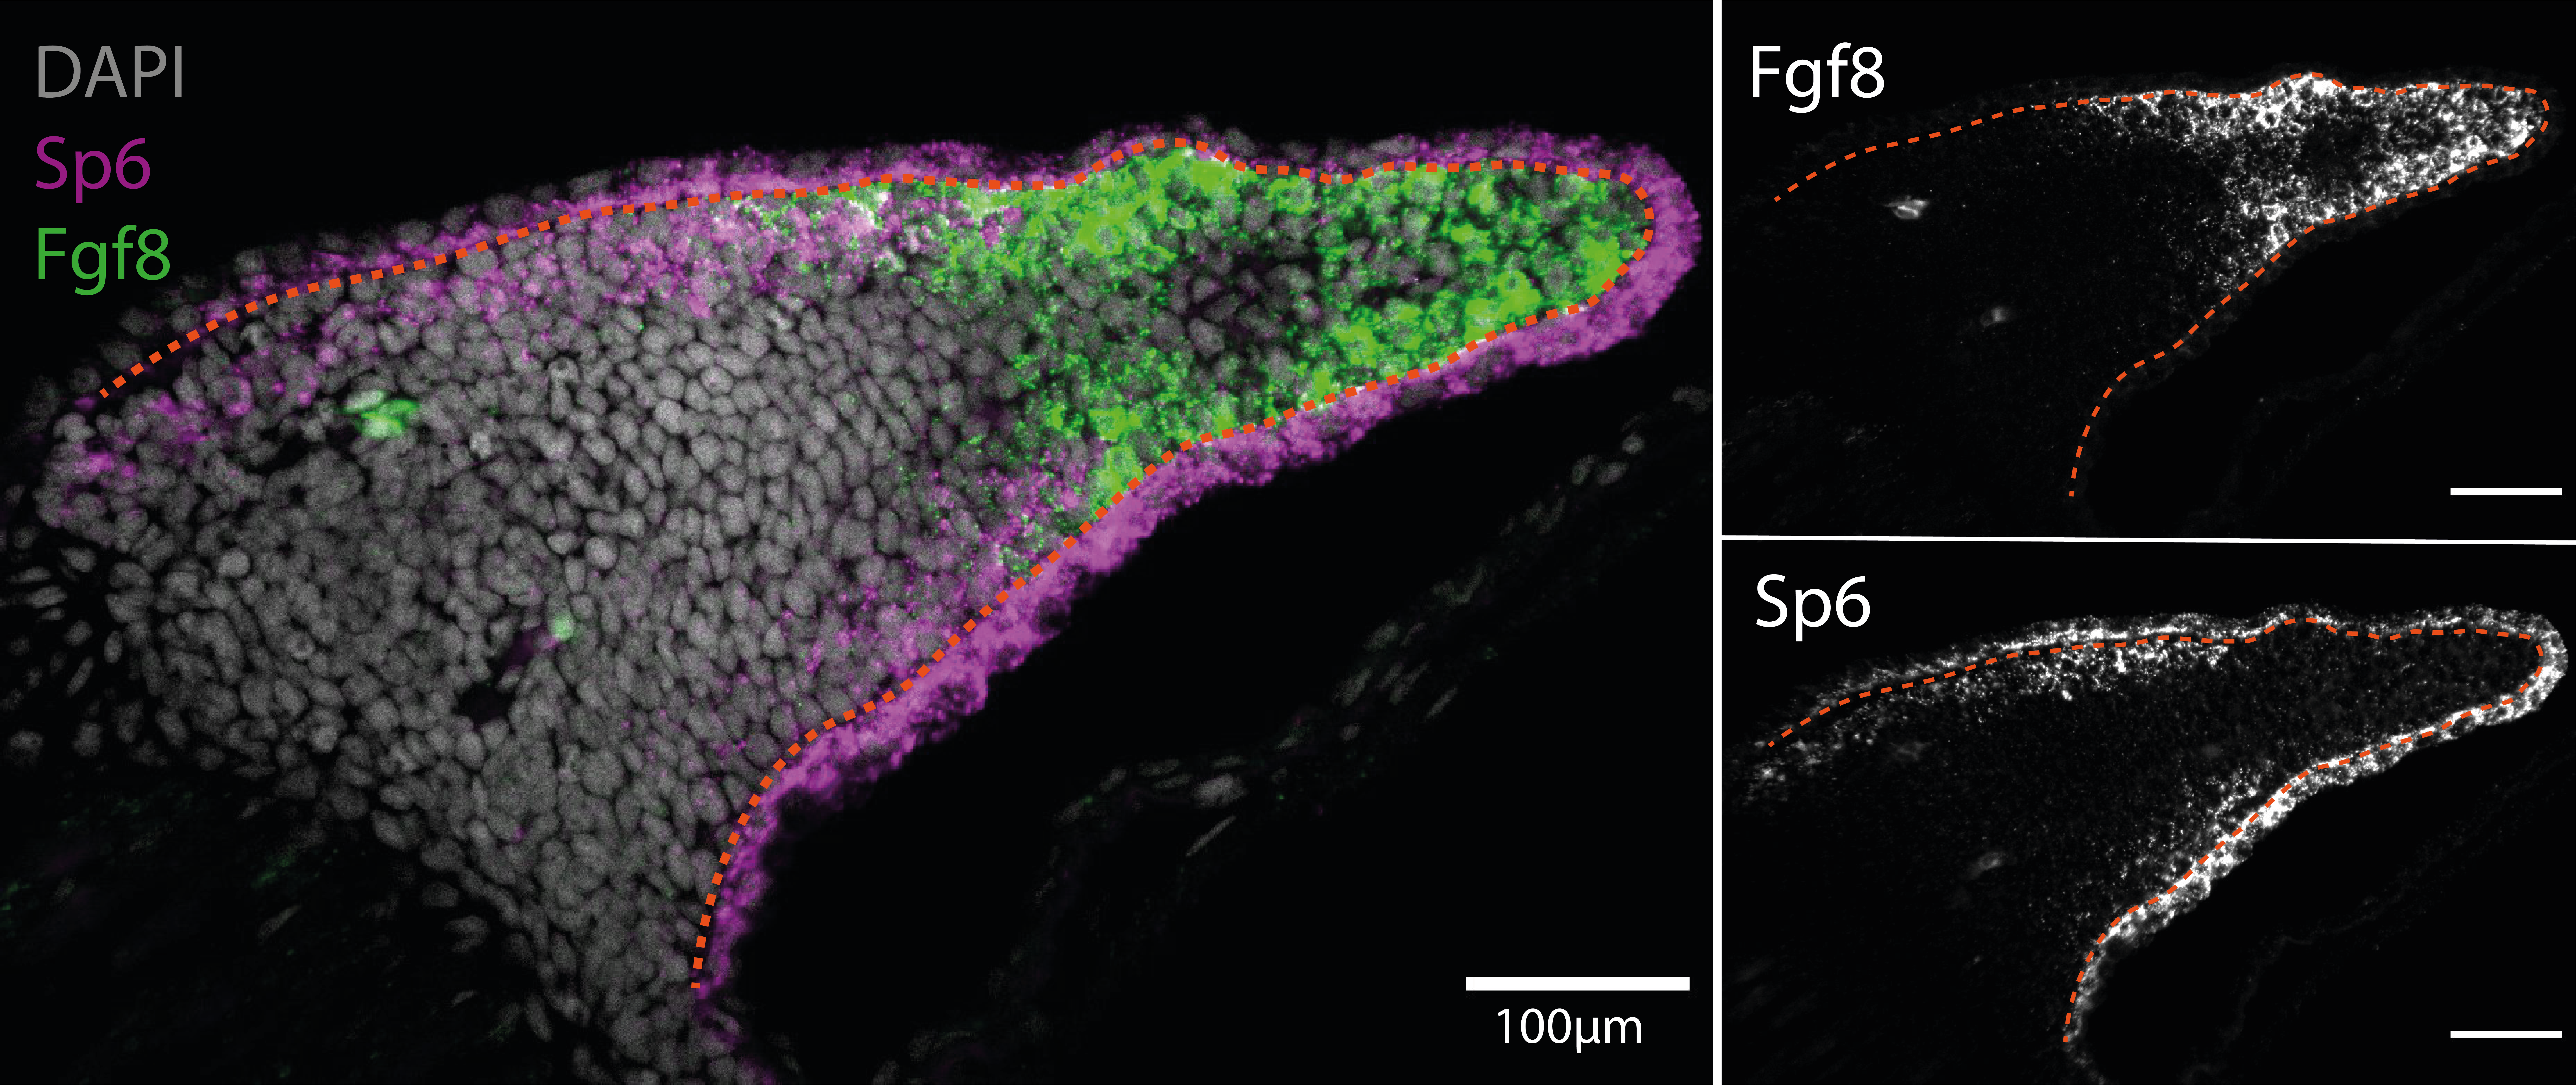

Supplement: supp [file elife-79762-supp-v1.zip › elife_poa_e79762_Figure_2_figure_supplement_1.png]

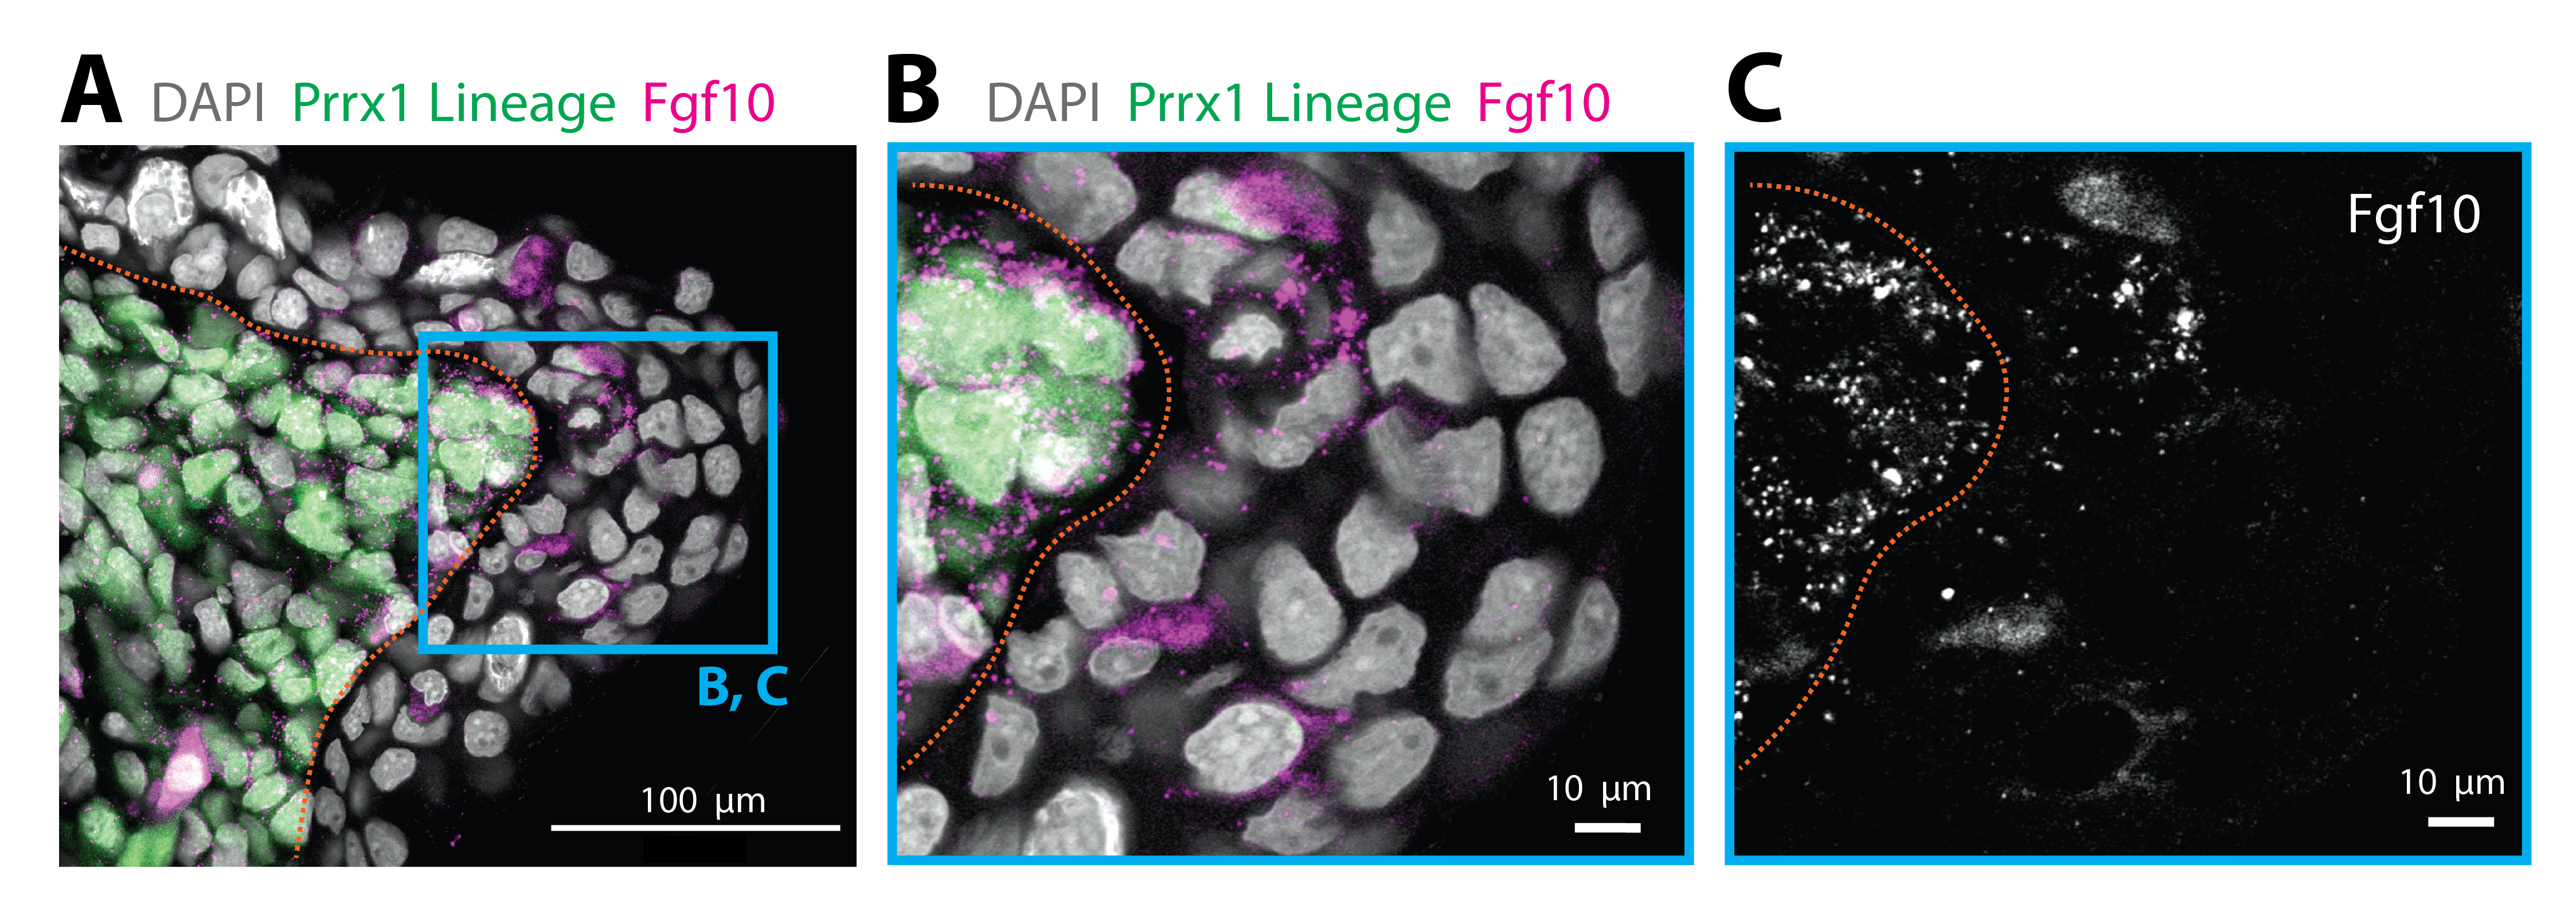

Supplement: supp [file elife-79762-supp-v1.zip › elife_poa_e79762_Figure_4_figure_supplement_1.png]

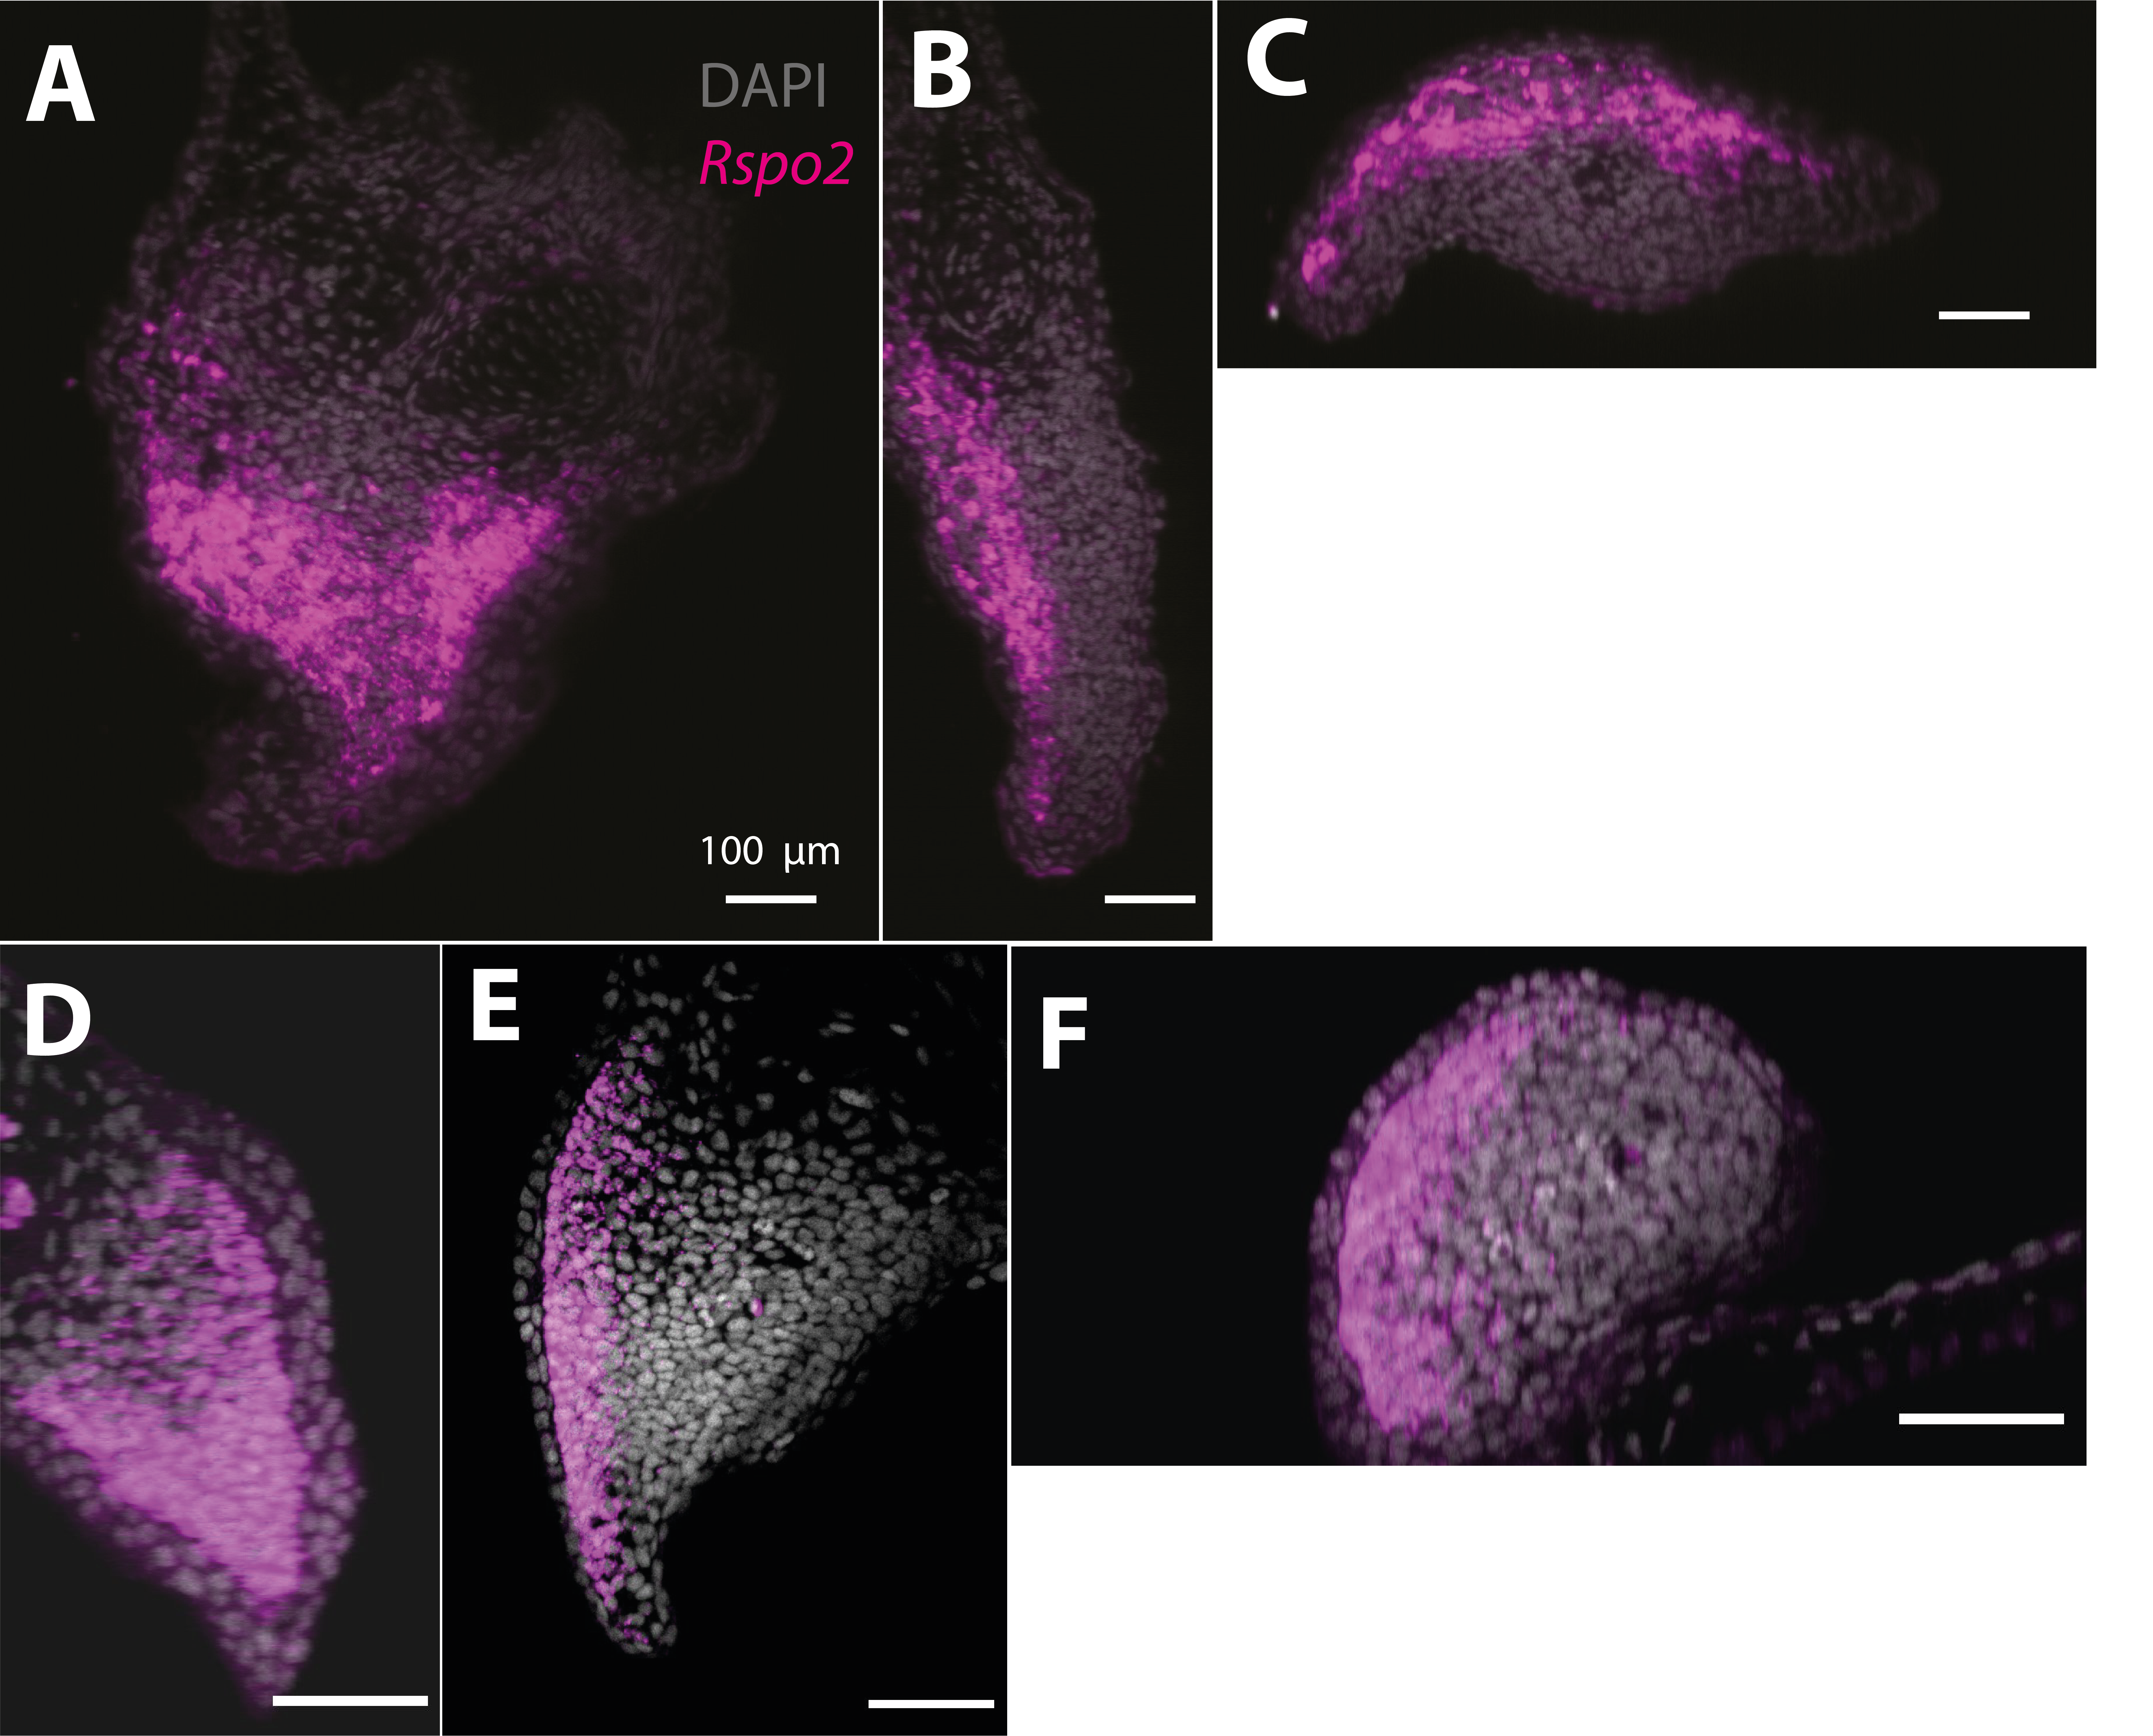

Supplement: supp [file elife-79762-supp-v1.zip › elife_poa_e79762_Figure_4_figure_supplement_2.png]

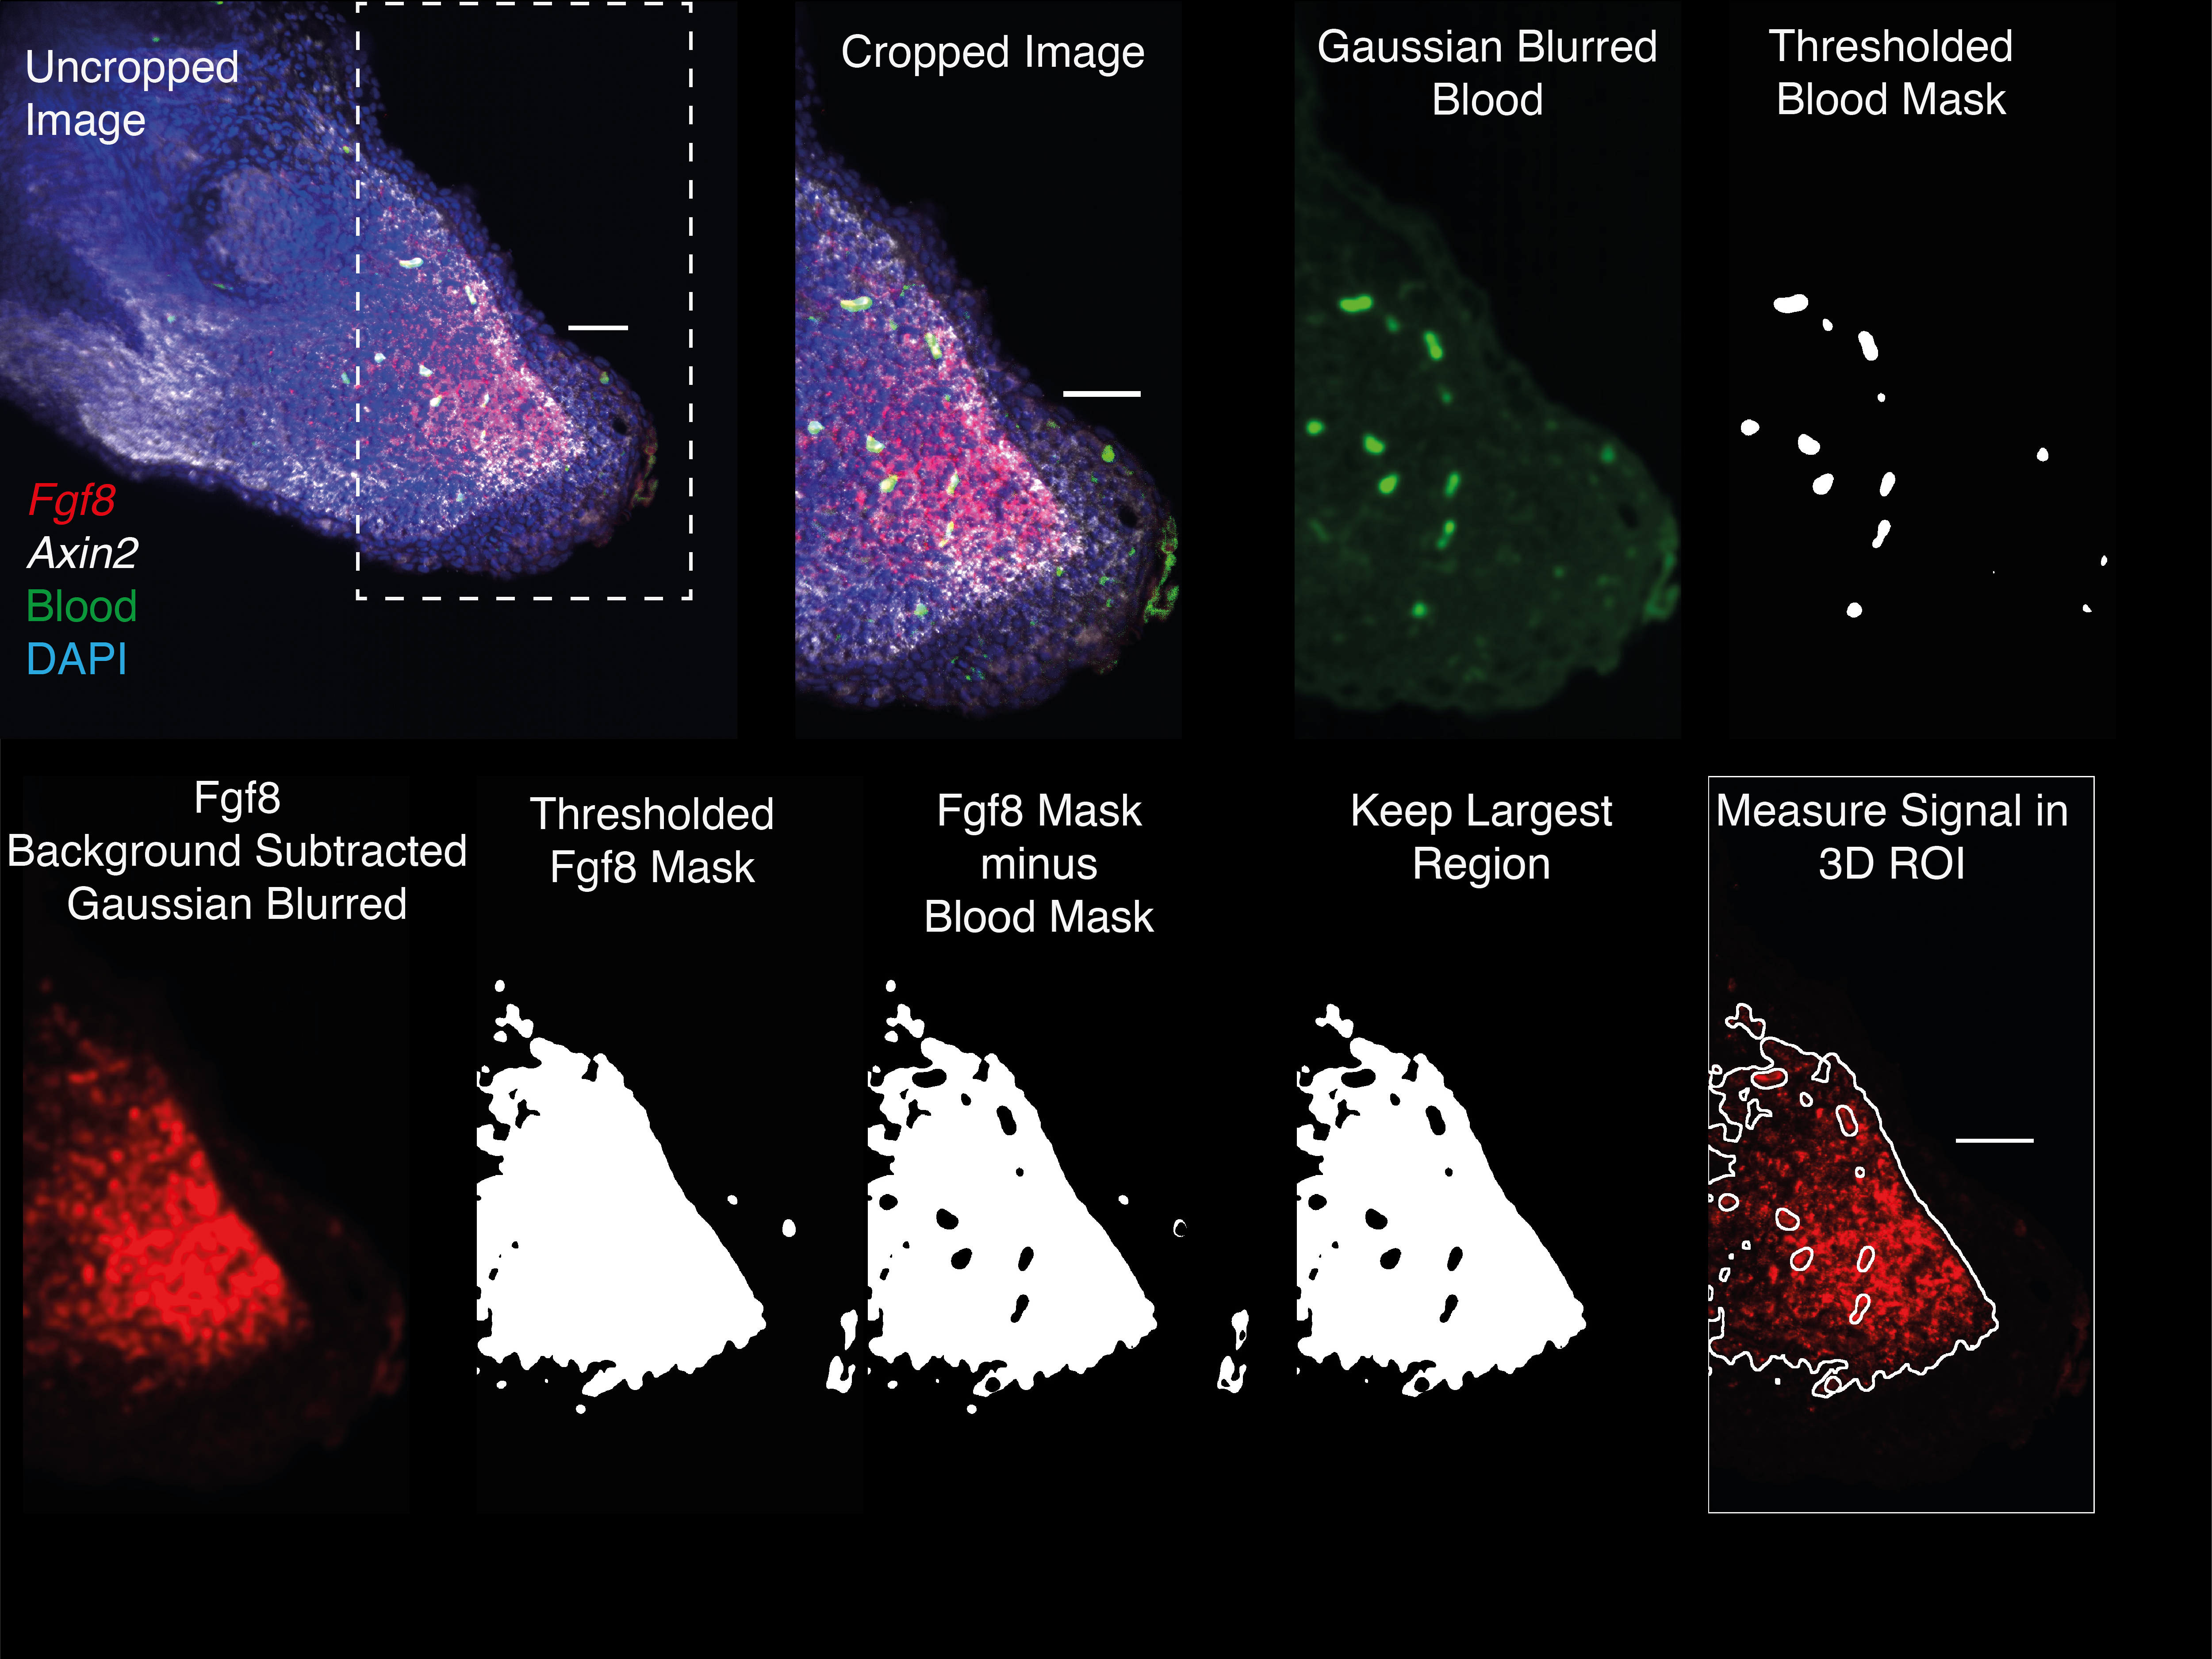

Supplement: supp [file elife-79762-supp-v1.zip › elife_poa_e79762_Figure_5_figure_supplement_1.png]

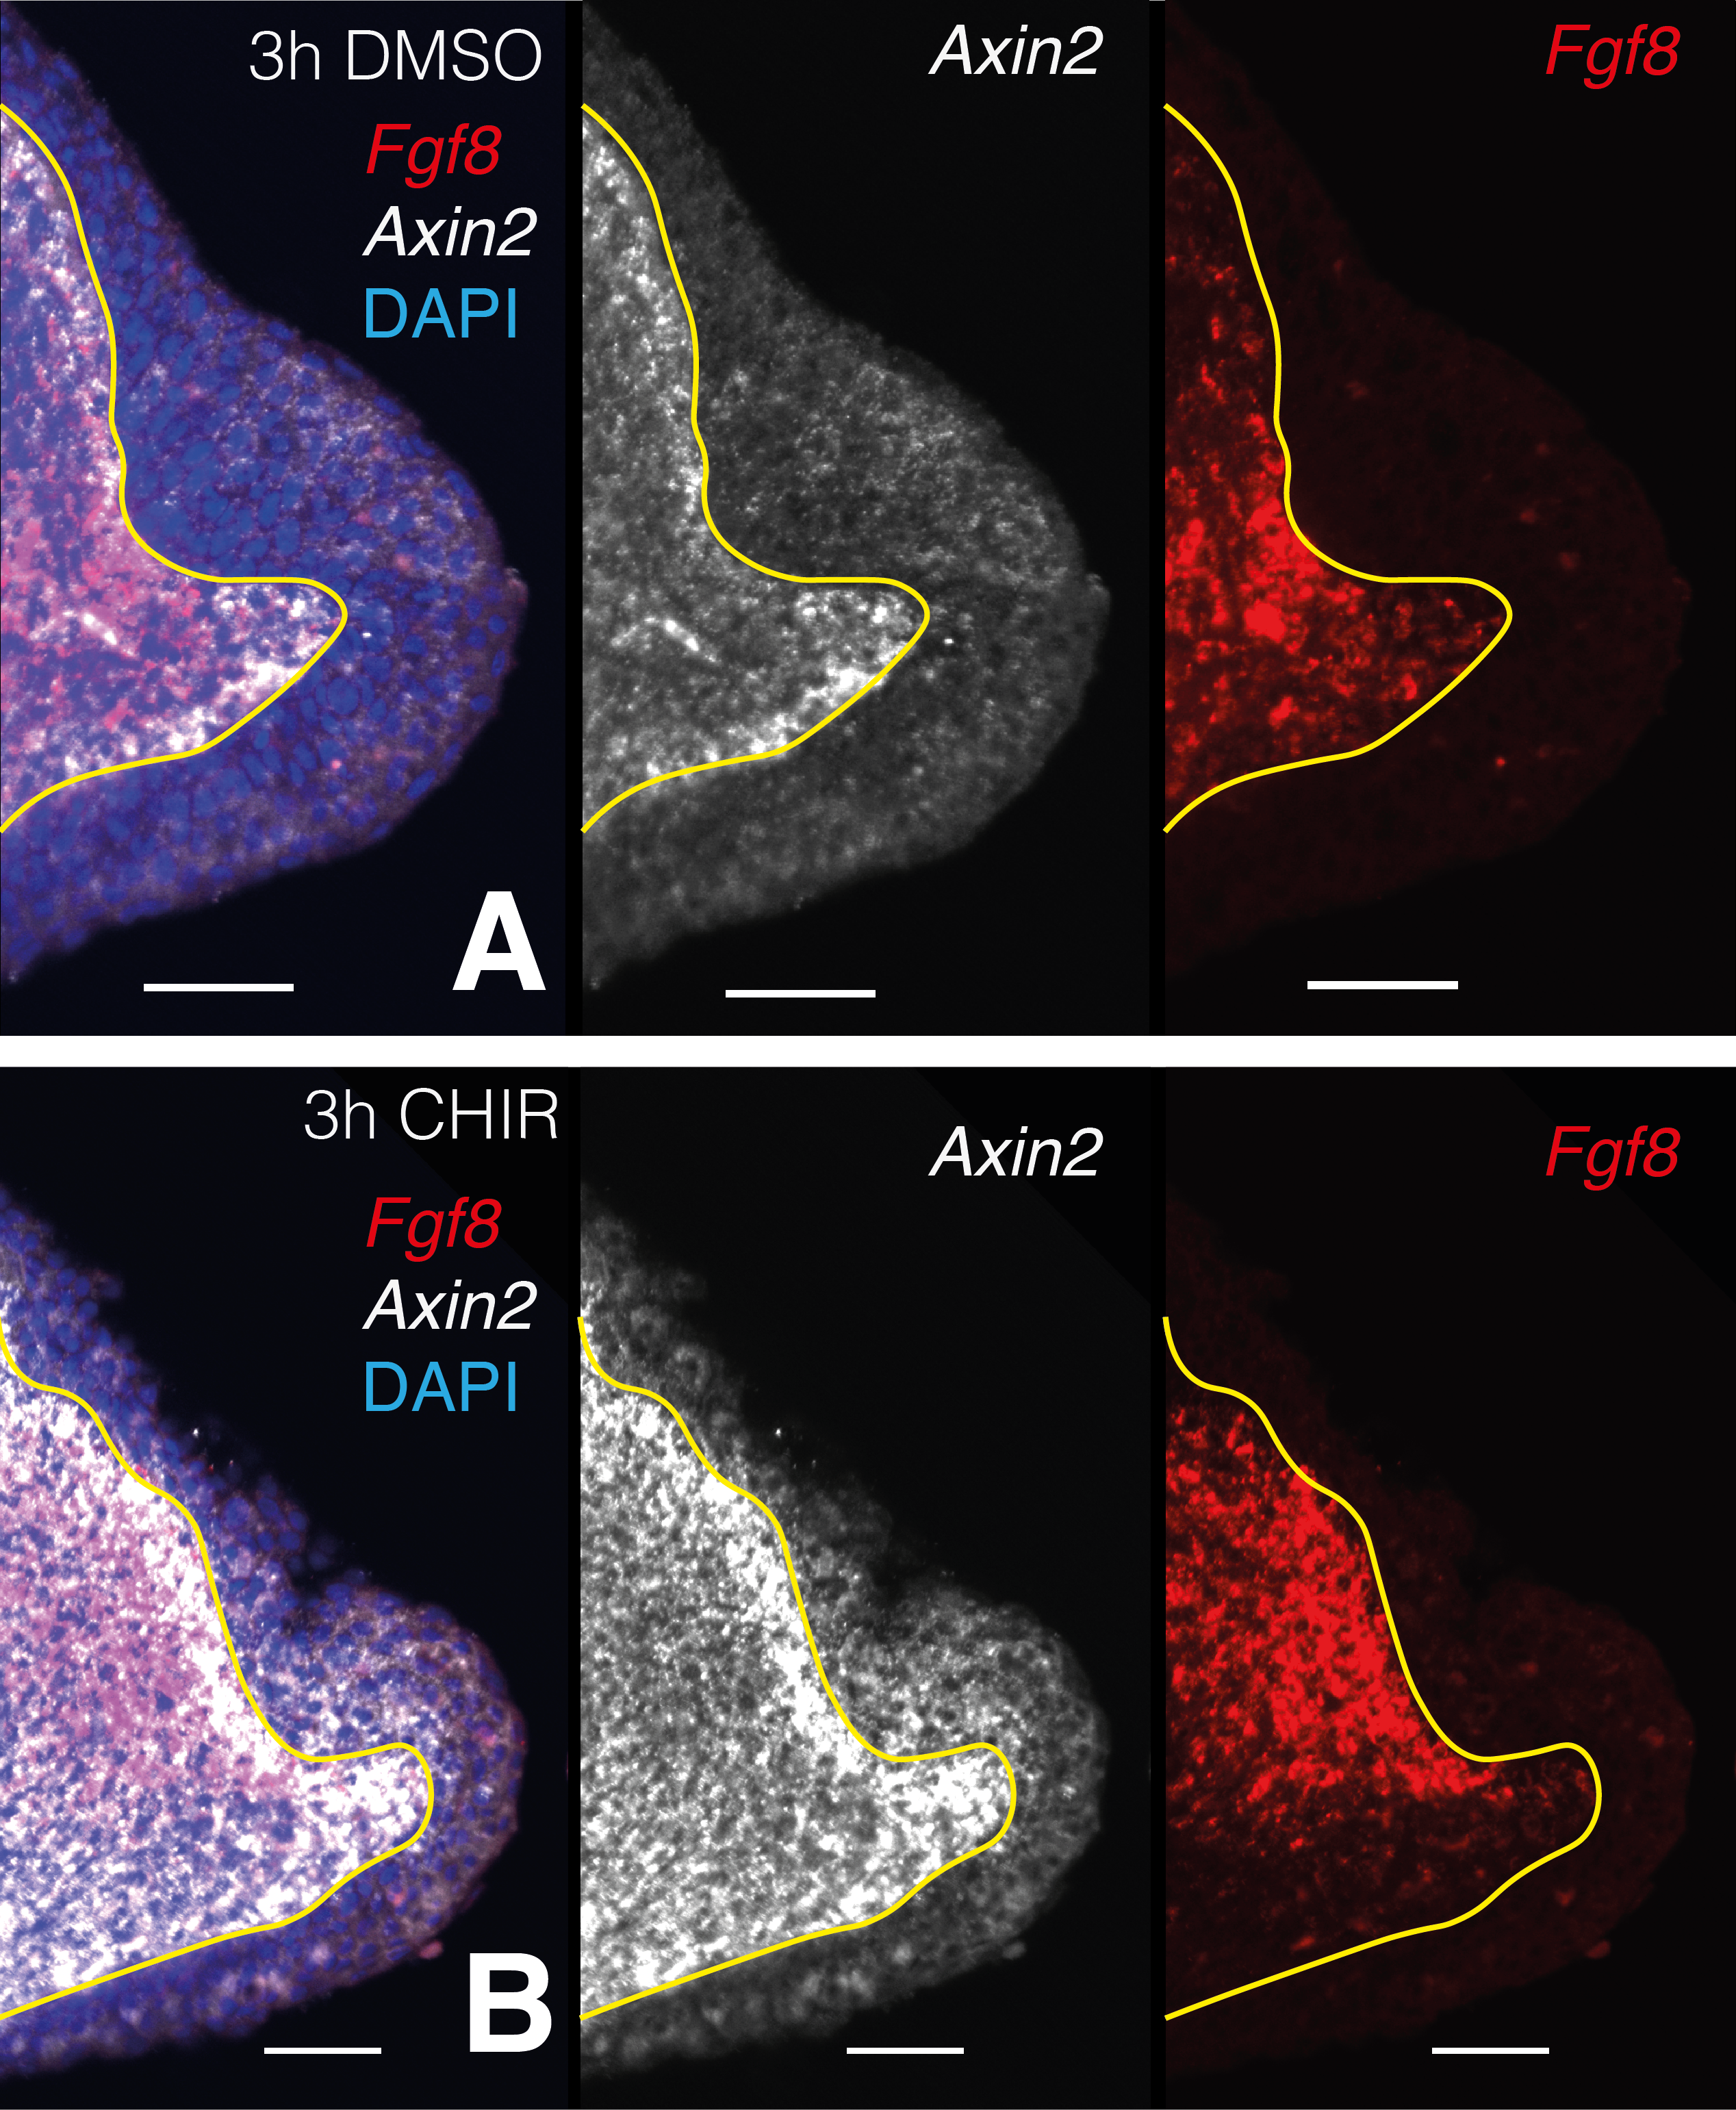

Supplement: supp [file elife-79762-supp-v1.zip › elife_poa_e79762_Figure_5_figure_supplement_2.png]

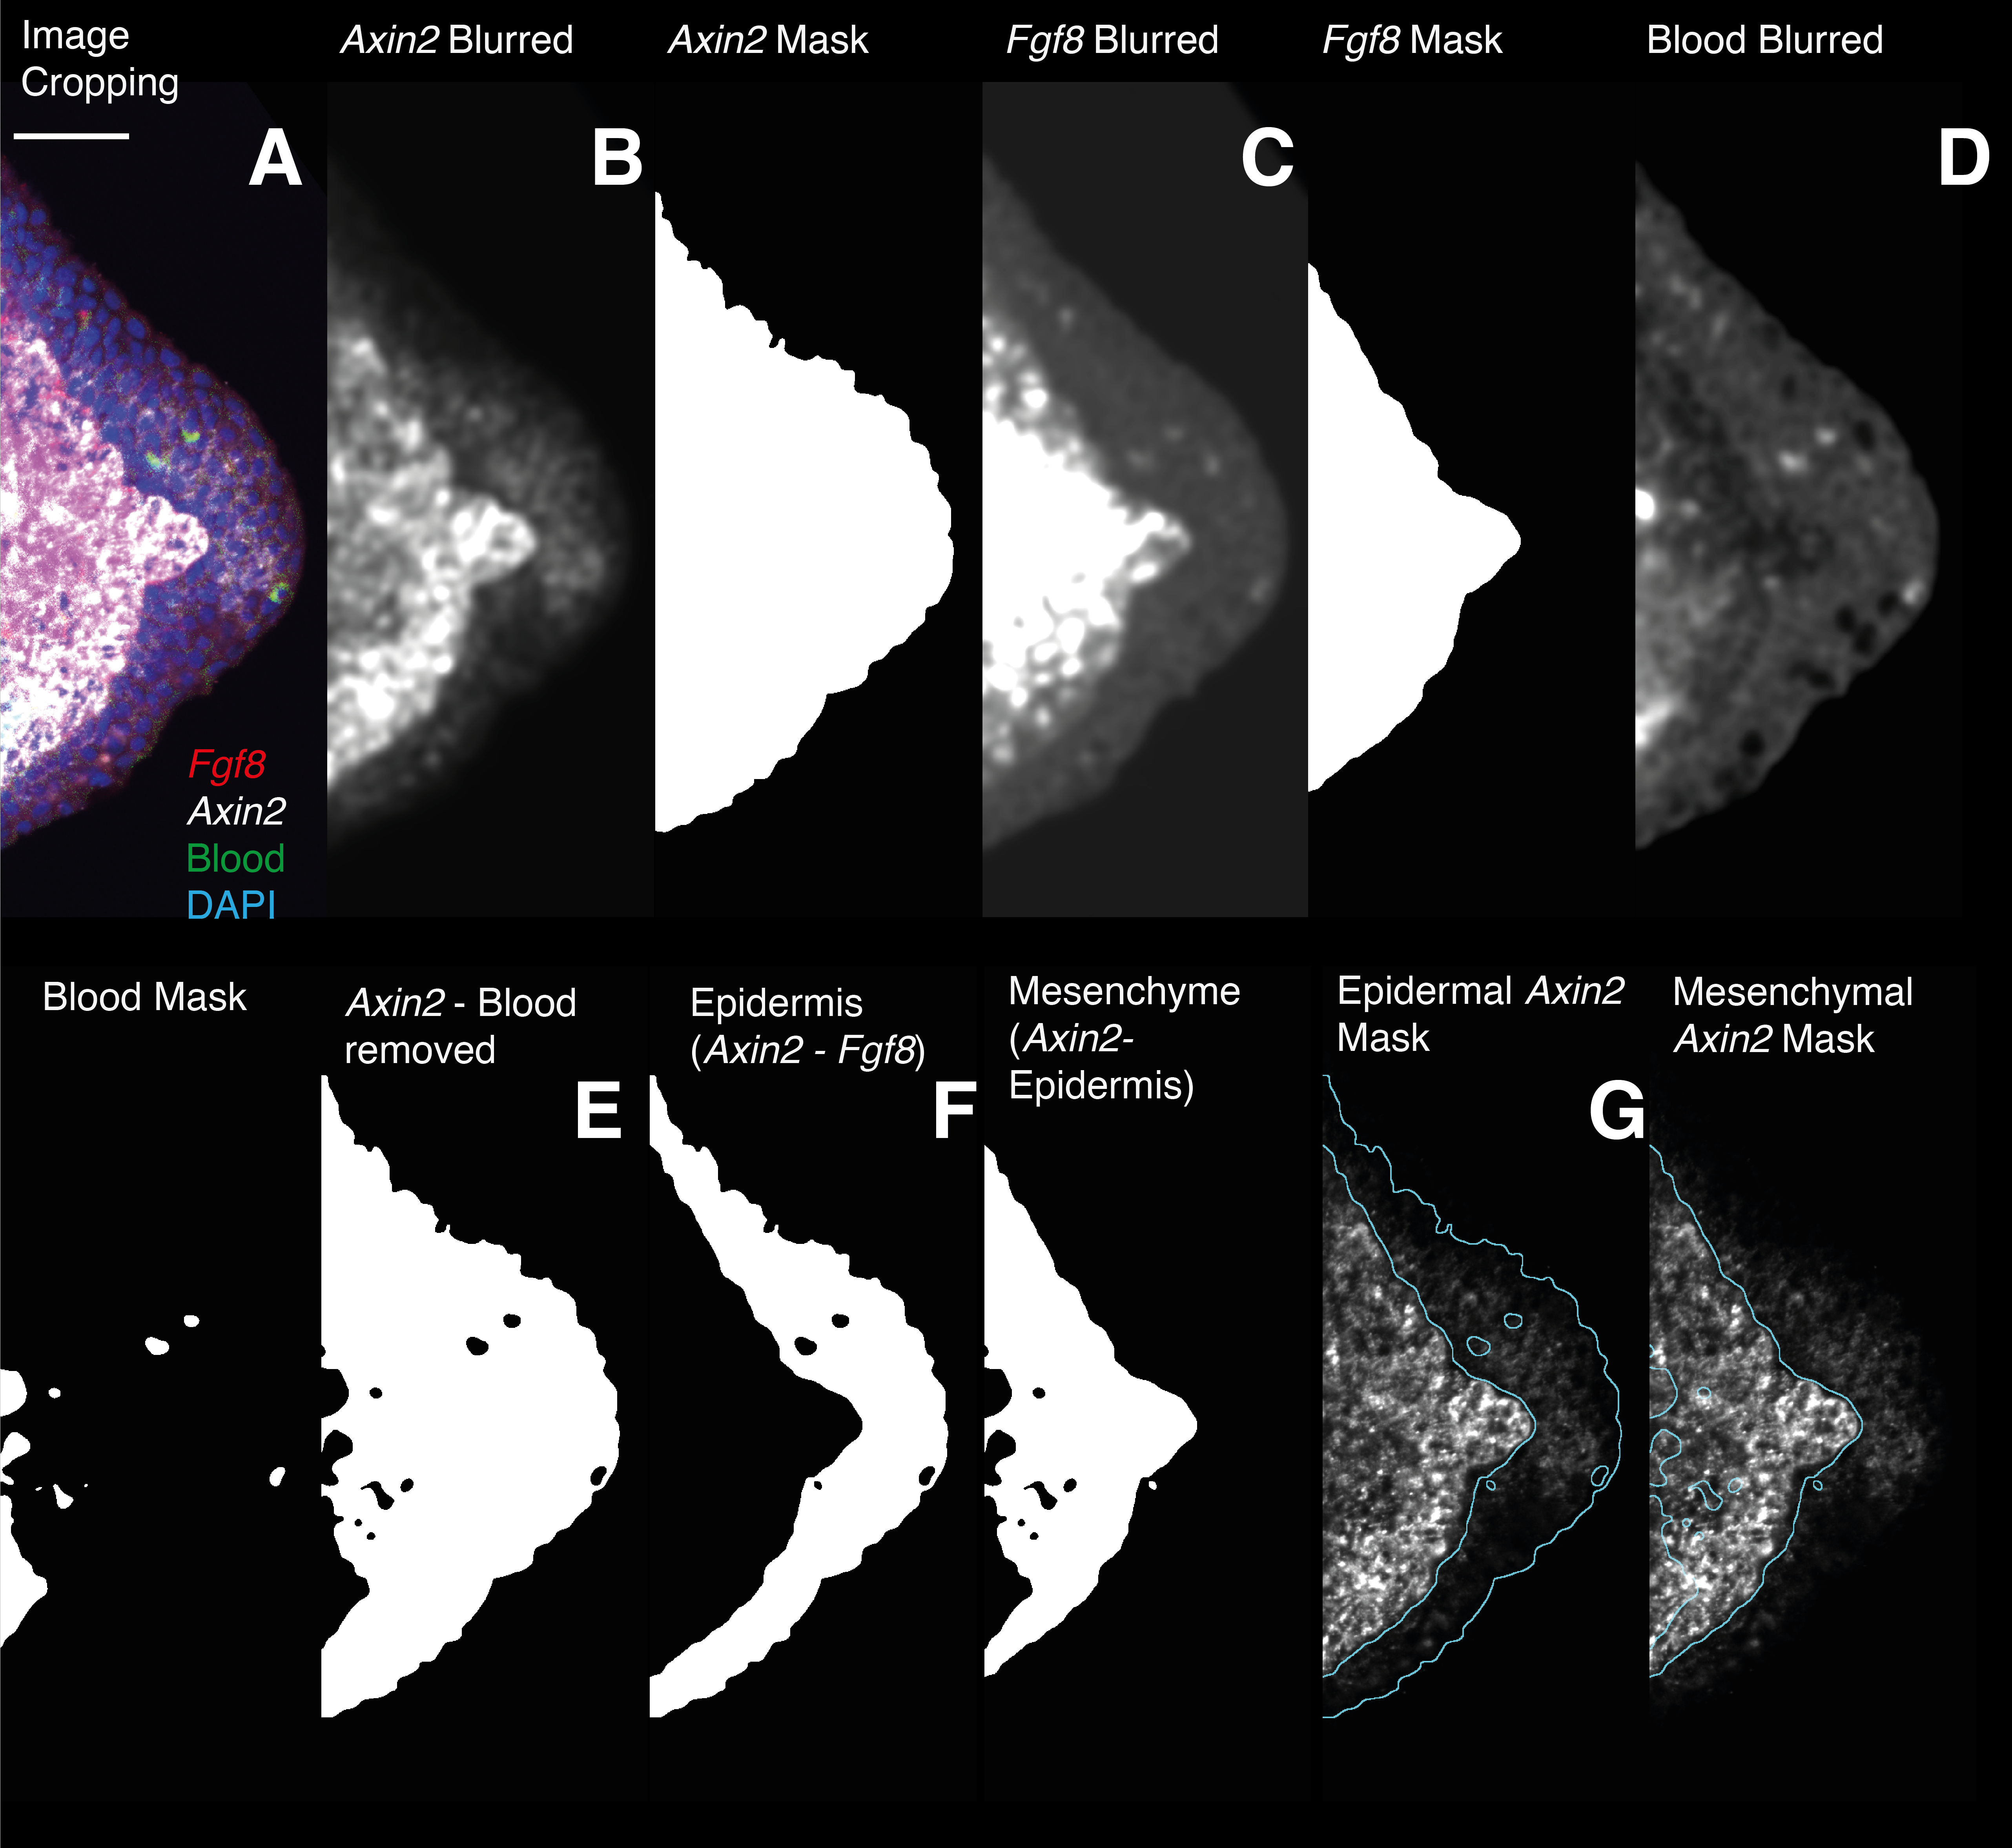

Supplement: supp [file elife-79762-supp-v1.zip › elife_poa_e79762_Figure_5_figure_supplement_3.png]
